# Supplementary material for: Link between COVID-19-related in-hospital mortality in continental France administrative areas and weather: an ecological study
Source: PubMed Central journal article supplement — BMJ Open. 2021 Mar 11;11(3):e043269. doi: 10.1136/bmjopen-2020-043269 (PMC7956732; doi:10.1136/bmjopen-2020-043269), 2021-03-11
Supplement: bmjopen-2020-043269.draft_revisions.pdf [file bmjopen-2020-043269.draft_revisions.pdf]

# BMJ Open

BMJ Open is committed to open peer review. As part of this commitment we make the peer review history of every article we publish publicly available.

When an article is published we post the peer reviewers' comments and the authors' responses online. We also post the versions of the paper that were used during peer review. These are the versions that the peer review comments apply to.

The versions of the paper that follow are the versions that were submitted during the peer review process. They are not the versions of record or the final published versions. They should not be cited or distributed as the published version of this manuscript.

BMJ Open is an open access journal and the full, final, typeset and author-corrected version of record of the manuscript is available on our site with no access controls, subscription charges or pay-per-view fees (<http://bmjopen.bmj.com>).

If you have any questions on BMJ Open's open peer review process please email [info.bmjopen@bmj.com](mailto:info.bmjopen@bmj.com)

# BMJ Open

## **Covid-19-Linked Mortality in Continental France Administrative Areas Is Linked to a Weather Index**

|                               |                                                                                        |
|-------------------------------|----------------------------------------------------------------------------------------|
| Journal:                      | <i>BMJ Open</i>                                                                        |
| Manuscript ID                 | bmjopen-2020-043269                                                                    |
| Article Type:                 | Original research                                                                      |
| Date Submitted by the Author: | 30-Jul-2020                                                                            |
| Complete List of Authors:     | mejdoubi, mehdi; Centre Hospitalier de Valenciennes, djennaoui, mehdi<br>kyndt, xavier |
| Keywords:                     | COVID-19, Epidemiology < INFECTIOUS DISEASES, INFECTIOUS DISEASES                      |
|                               |                                                                                        |

SCHOLARONE™  
Manuscripts

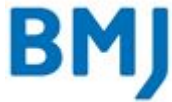

I, the Submitting Author has the right to grant and does grant on behalf of all authors of the Work (as defined in the below author licence), an exclusive licence and/or a non-exclusive licence for contributions from authors who are: i) UK Crown employees; ii) where BMJ has agreed a CC-BY licence shall apply, and/or iii) in accordance with the terms applicable for US Federal Government officers or employees acting as part of their official duties; on a worldwide, perpetual, irrevocable, royalty-free basis to BMJ Publishing Group Ltd ("BMJ") its licensees and where the relevant Journal is co-owned by BMJ to the co-owners of the Journal, to publish the Work in this journal and any other BMJ products and to exploit all rights, as set out in our [licence](#).

The Submitting Author accepts and understands that any supply made under these terms is made by BMJ to the Submitting Author unless you are acting as an employee on behalf of your employer or a postgraduate student of an affiliated institution which is paying any applicable article publishing charge ("APC") for Open Access articles. Where the Submitting Author wishes to make the Work available on an Open Access basis (and intends to pay the relevant APC), the terms of reuse of such Open Access shall be governed by a Creative Commons licence – details of these licences and which [Creative Commons](#) licence will apply to this Work are set out in our licence referred to above.

Other than as permitted in any relevant BMJ Author's Self Archiving Policies, I confirm this Work has not been accepted for publication elsewhere, is not being considered for publication elsewhere and does not duplicate material already published. I confirm all authors consent to publication of this Work and authorise the granting of this licence.

1  
2  
3  
4  
5 **Covid-19-Linked Mortality in Continental France Administrative Areas Is Linked to a**  
6  
7 **Weather Index**  
8  
9

10  
11 Mehdi Mejdoubi, M.D., Ph.D., Mehdi Djennaoui, M.D., and Xavier Kyndt, M.D.  
12  
13

14  
15  
16  
17  
18 **Author Affiliations:** Department of Radiology (M.M.), and Department of Public Health  
19 (M.D., X.K.), Hospital of Valenciennes, Valenciennes, France.  
20  
21

22  
23 **Corresponding Author:** Professor Mehdi Mejdoubi, Department of Radiology, Hospital of  
24 Valenciennes, CS 50479, 59322 Valenciennes Cedex, France. Tel: +33 3 27 14 50 24; Fax:  
25 +33 3 37 14 35 80; Email: mejdoubi-m@ch-valenciennes.fr  
26  
27  
28  
29

30  
31  
32 **Key words:** Covid-19, outbreak, pandemic, risk factors, weather  
33  
34  
35  
36  
37  
38

39 **Word count:** 2504  
40

41 **Declaration of interests:** The authors report no potential conflicts of interest.  
42  
43

44 **Funding:** There was no funding source for this study.  
45

46 **Credit authorship contribution statement:** Mehdi Mejdoubi: Conceptualization,  
47 Methodology, Data curation, Writing original draft. Xavier Kyndt: Methodology, Writing,  
48 Review editing. Mehdi Djennaoui: Methodology, Software, Data curation, Writing, Review  
49 editing.  
50  
51  
52  
53  
54  
55  
56  
57  
58  
59  
60

**Abstract****OBJECTIVE**

To assess the effect of a weather index on in-hospital Covid-19-linked deaths.

**DESIGN**

Ecological study.

**SETTING**

Continental France administrative areas. The study period, from 18 March to 30 May 2020, corresponds to the main outbreak period in France.

**POPULATION**

Covid-19-linked in-hospital deaths.

**MAIN OUTCOME MEASURES**

In-hospital deaths and demographics (population, human density, male sex and population percentage >59 years old) were obtained from national and centralized public databases.

County weather indexes were calculated by the French National Meteorological Agency.

**RESULTS**

Weather indicators and population density were factors independently associated with the Covid-19 death toll. Colder counties had significantly higher mortality rates ( $P < .00001$ ).

Percentages of males and population >59 years old in French counties did not affect Covid-19 in-hospital mortality.

**CONCLUSIONS**

Many parameters influence Covid-19-outbreak severity indicators. Human density is a strong factor but its exact importance is difficult to discern. Weather (mainly cold winter temperatures) was independently associated with mortality and could explain outbreak dynamics, which began and were initially more severe in the coldest counties of France.

Weather partly explains fatality-rate discrepancies observed worldwide.

### Strengths and limitations of this study

- In this ecological study (with data reliability, different climate zones, homogeneous social conduct during the outbreak), human density and weather index (related to cold temperatures during winter) independently influenced Covid-19 in-hospital mortality.
- In continental France, non-coastal counties and those with cold winters had significantly more in-hospital deaths.
- The coronavirus disease-2019 (Covid-19) pandemic is of multifactorial origin, and the impact of each etiological factor may vary among different countries and climes, therefore our results are mainly valid for temperate climes.

## Introduction

The world is experiencing a major coronavirus disease-2019 (Covid-19) pandemic since December 2019, with >660,000 deaths (as of July 29). In France, the outbreak began in early March in Alsace “Département” (an administrative area comparable to a county in the US and UK; henceforth county), although probable cases were likely observed as early as November 2019 (in the same area) and quickly spread throughout continental France, with the major hotspot being Paris and its suburbs. The national lockdown, started 17 March, achieved flattening of the infection-outbreak curve (with the mortality peak reached on 6 April) and was eased on 11 May. Deaths exceed 30,000 and the virus is still circulating, although the outbreak seems to be under control since the end of May.

Severe acute respiratory syndrome coronavirus-2 (SARS-CoV-2) transmission causes Covid-19. All epidemics are the result of multiple factors, like human density, population displacements and individual human susceptibility (age, comorbidities,...). The question remains whether meteorological parameters are an independent factor of disease transmission and/or severity. Epidemiological studies are often biased by the imprecise results of large-scale biological testing, which has only recently been fully implemented in France. In-hospital deaths are more reliable data source, even though it encompasses different types of patients (some intensively treated, other just receiving palliative care).

This study was undertaken to explore the relationship between Covid-19-related in-hospital deaths, at the county level, and weather indicators.

## Methods

### Population

In this observational, ecological study, the relationship between in-hospital, Covid-19-linked mortality and climate zones in 94 continental French counties areas were analyzed. The

1  
2  
3 overseas territories and Corsica were excluded from the analysis because of their particular  
4 localizations (with tropical or subtropical climate for some) and special insular conditions (for  
5 some). The study period lasted from 18 March to 30 May 2020.  
6  
7  
8  
9

## 10 11 12 **Data**

13  
14 We compared the cumulative in-hospital death tolls in continental France (64 million  
15 inhabitants) by county to other factors (human density, climate, age and sex). The 18,314  
16 deaths in France during the observation period classified by county were obtained from the  
17 French open-source database (*Santé Publique France*).<sup>1</sup> On 31 May and throughout June  
18 2020, respectively, 35 and 888 additional in-hospital deaths were not considered for the study.  
19  
20  
21  
22  
23  
24  
25

26 The following demographic characteristics were obtained from the French Institute for  
27 Statistics and Epidemiology (INSEE)<sup>2</sup> for each county: total population, percentage of the  
28 population >59 years, percentage of males in the population and density per km<sup>2</sup>.  
29  
30  
31  
32

33 To assess the climate conditions, the French counties were classified according to a  
34 French Climate Rigor Index (*Indice de Rigueur Climatique*).<sup>3</sup> That Index is calculated (from  
35 local measurements in each zone) by the French National Meteorological Agency. Three main  
36 climate patterns (H1, H2, H3) are defined according to winter temperatures, with H1  
37 representing the coldest zone and H3 the warmest. Regional H2 zones are known to be  
38 homogeneous, which contrast with H1 zone, also subcharacterized according to summer  
39 temperatures and coastal influence into H1a, H1b, H1c (H1b being colder in winter and hotter  
40 in summer than H1a). These zones (Figure 1) are ranked according to winter temperatures  
41 from coldest to warmest: H1b>H1a>H1c>H2>H3. The data used were collected historically  
42 and are not from winter 2020.  
43  
44  
45  
46  
47  
48  
49  
50  
51  
52  
53  
54  
55  
56  
57

## 58 **Statistical Analyses**

59  
60



All database variables were tested. Bivariate statistical analyses were computed between in-hospital Covid-19-related mortality, and each weather indicator and each demographic parameter (density, age, sex). For comparisons, the Kruskal-Wallis test and Pearson's correlation test were used, as appropriate. The significance level was set at 5%. Those bivariate analyses were also completed by multivariate linear-regression analysis. The statistical quality of the model was assessed with the variance-covariance matrix of residuals and normality for their distribution. Outlier data were analyzed by Cook's distance which showed 3 counties with outlier data: Paris (which received patients from its suburbs because it has, as the nation's capital, a disproportionately high hospital density), Haut-Rhin and Belfort (where the outbreak began). Therefore, a second multivariate model excluding outliers was built; it had a more homogeneous distribution of residuals. The multivariate analysis was finalized by a multiple linear-regression model excluding outliers, with categorization of quantitative data into binary variables using the 3rd quartile as the threshold value. Finally, quantitative data were categorized into binary variables, in an attempt to characterize the effect size. The statistical analyses were computed with R software version 4.0.0.

### **Patient and public involvement**

No patients were directly involved in this study.

### **Results**

Demographic and hospital data characteristics during the study period are reported Table 1. The county characteristics according to climate zone are given in Table 2. Bivariate analysis demonstrated a significant link between in-hospital Covid-19-related mortality and climate zone (Figure 2A). Mean mortality rates for zones H1a, -b, -c, H2 and H3 differed significantly ( $P = 8.84 \times 10^{-10}$ ). Bivariate analysis also found significant independent statistical links between Covid-19-linked mortality and population density or age >59 years but not male sex

(Table 3).

According to multivariate analysis (using H2 as the reference), Covid-19-linked mortality was associated with the following parameters: climate zones H1a and H1b, population density, and age. The results of the multiple linear-regression model excluding outliers (Figure 2B) were similar to those of the second model, with statistically significant effects of climate zones H1a and H1b and population density (Table 3). The only difference between this model and the previous one was the non-significance of the age. H3 climate zone and male sex were not significant in any of the 3 models constructed.

## Discussion

Our results showed that Covid-19-related mortality is due, throughout continental France, to at least 2 independent factors: weather index and population density. We did not find a difference among counties for the percent population aged >59 years or male sex. As for any outbreak, the Covid-19 pandemic has multifactorial origins. Some are already well-documented: individual factors (age, male sex, comorbidities), high human-population density and all types of human displacements. Many others are still being discussed (climate, weather indicators, socioeconomic factors, immune status, ...).

Individual risk factors for Covid-19 severity were identified relatively quickly, as this pathology often requires hospitalization (with or without ventilation), and it first emerged in developed countries. The main severity factors reported are: age >50 years, comorbidities, male sex.<sup>4-6</sup> Comorbidities are independent factors with a multivariable odds ratio (OR) ranging from 1.31 (diabetes) to 2.94 (pulmonary disease).<sup>4</sup> Age is a major independent factor, with a reported multivariable OR of 1.10 per 1-year increment<sup>5</sup> or 1.31 per 10-year increment<sup>4</sup> and male sex has an OR of 1.13. We attribute our inability to find an age effect among French counties to 2 reasons: first, only in-hospital deaths were available according to county and the

1  
2  
3 oldest patients were not systematically hospitalized (while in-assisted-residence deaths  
4 account for one-third of the death toll in France). Therefore, the among-county differences for  
5 the >59-year-old class were not retrieved from the in-hospital death toll. Nevertheless, despite  
6 the significantly higher proportion of >59-year-olds in H1c, H2 and H3 climate zones (Table  
7 2), in-hospital mortality was significantly higher in H1a categories. We did not find male sex  
8 to be discriminant among French counties, because they had a mean 48.4% of males with a  
9 small standard deviation of 0.5. Ethnicity<sup>7</sup> and socioeconomic status have also been also  
10 evoked as etiological factors but their independence remains to be proven.  
11  
12  
13  
14  
15  
16  
17  
18  
19  
20  
21  
22  
23

24 For most epidemics, especially of respiratory diseases, population density is a major cause of  
25 transmission. Cities are more affected than rural areas, and within cities, neighborhoods with  
26 dense housing are unsurprisingly more affected. The highest death tolls were in big cities  
27 (New York, Paris, Madrid, London, ...) and within them, poor neighborhoods were more  
28 severely affected for highly interwoven reasons. However, the 'number of people/land area' is  
29 a poor indicator of the human-population-density characteristic, as it is embedded in a wide  
30 variety of situations (housing mode, transportation mode, inner-city density, human  
31 interactions, cultural and behavioral habits,...). Indeed, many outbreaks occurred in (cruise or  
32 military) ships,<sup>8</sup> likely due to the same combined effect of closed environment and prolonged  
33 contact. Thus, the Diamond Princess cruise was classified among the most affected 'entities'  
34 at the beginning of the pandemic in March.<sup>9</sup> Somehow, cruise ships are the perfect laboratory  
35 model of outbreak spread in small cities. Our results showed that human density is an  
36 independent factor for Covid-19-linked deaths but we acknowledge that its exact importance  
37 cannot be determined, as we are limited by the wide range of situations that human-density  
38 encompasses, with many factors that should be taken into account. Our assessment of human  
39 density (and interactions) was mainly made during a lockdown, therefore the importance of  
40  
41  
42  
43  
44  
45  
46  
47  
48  
49  
50  
51  
52  
53  
54  
55  
56  
57  
58  
59  
60

1  
2  
3 this factor is likely underestimated herein. Also, human density does not have the same  
4  
5 connotation and consequences in poor and rich countries. The outbreak extension to hot  
6  
7 climates indicates that human interactions are likely even more important for the virus spread  
8  
9  
10 than weather (unlike our results).  
11  
12

13  
14 The cities gather not only locals but also draws infected people, with airport arrivals  
15  
16 representing the fastest entry point of the outbreak. Since the 1968-69 flu pandemic, we have  
17  
18 known that international travel and plane transportation is a major vector of virus  
19  
20 displacement. According to Liu et al,<sup>10</sup> Covid-19 has spread in multiple major cities in China  
21  
22 that have huge numbers of inbound and outbound passengers. They used an internet-based  
23  
24 (“Baidu”) migration scale index for 30 cities and found an association with confirmed cases.  
25  
26 Indeed, population migration and displacement or movement-control measures implemented  
27  
28 (quarantine, limited migration/limited travel/travel bans, closed borders) reduced virus spread  
29  
30 everywhere. In 2019, the top 5 countries receiving international tourists were France, Spain,  
31  
32 Italy, China and the USA. With the exception of China (whose death tolls are subject to  
33  
34 question), those countries were the main ones affected by the pandemic during March-April.  
35  
36 This human-migration dynamic partly explains the epidemic’s temporality worldwide.  
37  
38 Some human behaviors (hand-shaking, cheek-kissing, body contact, crowds, ...), intrinsically  
39  
40 responsible for social-distancing differences, are also likely to influence SARS-Cov-2  
41  
42 transmission. But, within a small- or medium-sized country (as in France), they may be  
43  
44 relatively homogeneous. It is difficult to individualize these cultural factors, and no clear and  
45  
46 unbiased study indicators have been identified, but they likely account for mortality  
47  
48 discrepancies among countries. For example, massive virus spreading was reported after  
49  
50 carnivals in different settings (New Orleans in Louisiana, Gangelte in Germany,<sup>11</sup> ...).  
51  
52  
53  
54  
55  
56  
57  
58  
59  
60

1  
2  
3 Viral epidemics, such flu and gastroenteritis, are known to follow seasonal cycles with  
4  
5 resurgences during autumn and winter, favored by cold temperatures. Previous coronavirus  
6  
7 outbreaks (SARS-CoV-1 and MERS) were also linked to weather<sup>10</sup> (mainly temperature). A  
8  
9 climate effect on the wide-dissemination of a respiratory disease is a highly intuitive  
10  
11 conclusion and SARS-CoV-2 is transmitted mainly through droplets and aerosols.  
12  
13

14 Temperature, humidity and wind were found to impact the spread of this outbreak,<sup>10,12-14</sup>  
15  
16 based on confirmed infections. Notably, biological testing is known to monitor imprecisely  
17  
18 this outbreak because 23%-40% of the cases are asymptomatic.<sup>15</sup> Moreover, false-negative  
19  
20 reverse transcriptase-polymerase chain reaction results may occur. Therefore, our study  
21  
22 focused on more precise, in-hospital deaths, collected in a centralized electronic database.  
23  
24

25  
26 In many countries spanning multiple latitudes, clear north-south gradients were observed  
27  
28 with more deaths further north: France, Spain, Italy, USA (as of July 27, Illinois had  
29  
30 proportionally 2.2 more deaths than Florida, despite Florida has the highest percentage in the  
31  
32 US of population > 65 years old). Notably, Rome, the largest Italian city with a Mediterranean  
33  
34 climate, was proportionally less affected than northern cities, which has a different climate.  
35  
36

37  
38 Based on our results for continental France, southern and coastal areas seem to be more  
39  
40 protected than colder inland areas. Indeed, our results were confirmed by the observations in  
41  
42 Spain, where Madrid region was hit harder than coastal and southern zones. Western Europe  
43  
44 (France, UK, Belgium, Netherlands and Germany) has a mainly oceanic climate and, indeed,  
45  
46 the outbreak followed the same course (sudden rise in March and decline in May), despite  
47  
48 their different public health policy approaches. Also, few large cities in East and Southeast  
49  
50 Asia (except Wuhan) were Covid-19 pandemic hotspots, despite human density being among  
51  
52 the highest in the world. That observation can be explained by 3 categories of factors: 1)  
53  
54 aggressive management of the epidemic in cold areas (South Korea, Japan, China  
55  
56 implemented the strictest lockdown in the world), 2) other protective behaviors, including  
57  
58  
59  
60

1  
2  
3 traditional cultural distancing, 3) some protective climate effect in warm areas (Hong Kong,  
4 Singapore, Taiwan,...). Of course, the combination of these 3 factors would achieve the  
5  
6 highest protection.  
7  
8

9  
10 However, the climate's protective effect alone would not spare a population from the  
11 outbreak and, indeed, almost all countries on earth have been impacted. Moreover, the  
12 protection afforded by higher temperatures remains to be precisely defined depending on the  
13 climate, because the interactions among temperature, humidity, wind and sunlight are  
14 complex. Still, Prata et al<sup>16</sup> showed that, in Brazil, the climate's effect exists even in tropical  
15 regions, where the range of temperatures is limited. The weather effect may also be supported  
16 by the massive infections observed in climatized facilities, in meat processing facilities (in  
17 USA,<sup>17</sup> France, and Germany) or in boats,<sup>8</sup> but many confounding factors may be involved.  
18 Air pollution also was shown to be associated with virus spread in northern Italy,<sup>18</sup> but  
19 pollution is closely related to weather conditions, therefore its independent role is still to  
20 precise.  
21  
22

23  
24 Public health strategies have been extensively implemented worldwide.<sup>19</sup> It is likely that  
25 climate alone is not sufficient to extinguish this outbreak and public health interventions,  
26 aimed at containing and reducing virus circulation, will be needed on a long-term basis. Both  
27 weather factors and human social behaviors (partly linked to meteorological conditions) seem  
28 to contribute to Covid-19 epidemiological dynamics. This multifactorial character explains  
29 why some warm countries in Central and South America are experiencing massive epidemics  
30 (Brazil, Mexico), despite some climate protection, because their national strategies implement  
31 only partial social distancing and, even now, are somehow opposing it. Liu et al<sup>10</sup> concluded  
32 rightly for China: "this epidemic will be faded to a large degree in the coming warmer season  
33 with the enforcement of public health interventions in China," which emphasizes the absolute  
34 need for social-distancing and not to rely solely on a weather effect.  
35  
36  
37  
38  
39  
40  
41  
42  
43  
44  
45  
46  
47  
48  
49  
50  
51  
52  
53  
54  
55  
56  
57  
58  
59  
60

## Strengths and Limitations

Few countries have simultaneous hospital-data reliability, different climate zones, homogeneous social conduct during the outbreak (including a uniformly implemented lockdown) and high Covid-19-related mortality. France met all those conditions. However, our study has some limitations. First, the death-toll breakdown per county is available only for in-hospital deaths. Second, the impact of each etiological factor may vary among different countries and climes, therefore our results are mainly valid for temperate countries in the northern hemisphere. Third, the France weather index we used provided a historic collection of weather data, but not winter 2019-2020 conditions.

## Conclusion

Our findings suggest that climate is an independent factor influencing Covid-19-linked mortality at the country level in France. Human-population density (and therefore social interactions) is an independent factor, whose impact has been widely proven. These factors, along with others (age pyramid, cultural factors, ...), explain the course of this pandemic throughout the world. The fatality discrepancies among countries, and among administrative subdivisions within countries, likely follow the same rules worldwide. Our findings also imply that next winter will likely see resurgent Covid-19 outbreaks, but seasonality is complex, as it involves more than climate alone (immune status, virus mutation, ...).

## REFERENCES

1. [https://geodes.santepubliquefrance.fr/#c=indicator&i=covid\\_hospit\\_incid.incid\\_dc&s=2020-04-06&t=a01&view=map2](https://geodes.santepubliquefrance.fr/#c=indicator&i=covid_hospit_incid.incid_dc&s=2020-04-06&t=a01&view=map2)

- 1  
2  
3 **2.** <https://www.insee.fr/fr/statistiques/1893198>
- 4  
5 **3.** [https://www.legifrance.gouv.fr/affichTexteArticle.do;jsessionid=C15D8E5264D6C645DD1](https://www.legifrance.gouv.fr/affichTexteArticle.do;jsessionid=C15D8E5264D6C645DD1664B5538085A0.tplgfr38s_2?idArticle=LEGIARTI000026910138&cidTexte=LEGITEXT00026910098&dateTexte=20200728)
- 6  
7  
8  
9  
10  
11  
12  
13  
14  
15  
16  
17  
18  
19  
20  
21  
22  
23  
24  
25  
26  
27  
28  
29  
30  
31  
32  
33  
34  
35  
36  
37  
38  
39  
40  
41  
42  
43  
44  
45  
46  
47  
48  
49  
50  
51  
52  
53  
54  
55  
56  
57  
58  
59  
60  
**664B5538085A0.tplgfr38s\_2?idArticle=LEGIARTI000026910138&cidTexte=LEGITEXT00**  
**0026910098&dateTexte=20200728**
- 4.** Cummings MJ, Baldwin MR, Abrams D, et al. Epidemiology, clinical course, and outcomes of critically ill adults with COVID-19 in New York City: a prospective cohort study. *Lancet*. 2020:S0140-6736(20)31189-2. doi:10.1016/S0140-6736(20)31189-2.
- 5.** Zhou F, Yu T, Du R, et al. Clinical course and risk factors for mortality of adult inpatients with COVID-19 in Wuhan, China: a retrospective cohort study. *Lancet*. 2020 Mar 28;395(10229):1054-62. doi: 10.1016/S0140-6736(20)30566-3.
- 6.** Petrilli CM, Jones SA, Yang J, et al. Factors associated with hospital admission and critical illness among 5279 people with coronavirus disease 2019 in New York City: prospective cohort study. *BMJ*. 2020 May 22;369:m1966. doi: 10.1136/bmj.m1966.
- 7.** Pareek M, Bangash MN, Pareek N, Pan D, Sze S, Minhas JS, Hanif W, Khunti K. Ethnicity and COVID-19: an urgent public health research priority. *Lancet*. 2020 May 2;395(10234):1421-1422. doi:10.1016/S0140-6736(20)30922-3.
- 8.** Ing AJ, Cocks C, Green JP. COVID-19: in the footsteps of Ernest Shackleton. *Thorax*. 2020 May 27;thoraxjnl-2020-215091. doi:10.1136/thoraxjnl-2020-215091.
- 9.** Mizumoto K, Kagaya K, Zarebski A, Chowell G. Estimating the asymptomatic proportion of coronavirus disease 2019 (COVID-19) cases on board the Diamond Princess cruise ship, Yokohama, Japan, 2020. *Euro Surveill*. 2020 Mar;25(10):2000180. doi:10.2807/1560-7917.ES.2020.25.10.2000180.
- 10.** Liu J, Zhou J, Yao J, et al. Impact of meteorological factors on the COVID-19 transmission: a multi-city study in China. *Sci Total Environ*. 2020 Jul 15 ;726 :138513. doi:10.1016/j.scitotenv.2020.138513.



- 1  
2  
3 **11.** Walker A, Houwaart T, Wienemann T, et al. Genetic structure of SARS-CoV-2 reflects  
4 clonal superspreading and multiple independent introduction events, North-Rhine Westphalia,  
5 Germany, February and March 2020. *Euro Surveill.* 2020 Jun;25(22) :2000746. doi:  
6  
7 10.2807/1560-7917.ES.2020.25.22.2000746.  
8  
9  
10  
11 **12.** Shi P, Dong Y, Yan H, et al. Impact of temperature on the dynamics of the COVID-19  
12 outbreak in China. *Sci Total Environ.* 2020 Aug 1;728:138890. doi:  
13  
14 10.1016/j.scitotenv.2020.138890.  
15  
16  
17 **13.** Qi H, Xiao S, Shi R, et al. COVID-19 transmission in mainland China is associated with  
18 temperature and humidity: a time-series analysis. *Sci Total Environ.* 2020 Aug 1;728:138778.  
19  
20  
21  
22  
23  
24  
25  
26  
27 **14.** Sajadi MM, Habibzadeh P, Vintzileos A, et al. Temperature, humidity, and latitude  
28 analysis to estimate potential spread and seasonality of coronavirus disease 2019 (COVID-  
29 19). *JAMA Netw Open.* 2020 Jun 1;3(6):e2011834. doi:  
30  
31  
32  
33  
34  
35  
36  
37 **15.** Zhang HJ, Su YY, Xu SL, et al. Asymptomatic and symptomatic SARS-CoV-2 infections  
38 in close contacts of COVID-19 patients: a seroepidemiological study. *Clin Infect Dis.* 2020  
39  
40  
41 Jun 16:ciaa771. doi:10.1093/cid/ciaa771.  
42  
43  
44 **16.** Prata DN, Rodrigues W, Bermejo PH. Temperature significantly changes COVID-19  
45 transmission in (sub)tropical cities of Brazil. *Sci Total Environ.* 2020 Aug 10 ;729:138862.  
46  
47  
48  
49  
50  
51  
52  
53  
54  
55  
56  
57 **17.** Dyal JW, Grant MP, Broadwater K, et al. COVID-19 among workers in meat and poultry  
58 processing facilities - 19 states, April 2020. *MMWR Morb Mortal Wkly Rep.* 2020 May  
59  
60  
61  
62  
63  
64  
65  
66  
67  
68  
69  
70  
71  
72  
73  
74  
75  
76  
77  
78  
79  
80  
81  
82  
83  
84  
85  
86  
87  
88  
89  
90  
91  
92  
93  
94  
95  
96  
97  
98  
99  
100  
101  
102  
103  
104  
105  
106  
107  
108  
109  
110  
111  
112  
113  
114  
115  
116  
117  
118  
119  
120  
121  
122  
123  
124  
125  
126  
127  
128  
129  
130  
131  
132  
133  
134  
135  
136  
137  
138  
139  
140  
141  
142  
143  
144  
145  
146  
147  
148  
149  
150  
151  
152  
153  
154  
155  
156  
157  
158  
159  
160  
161  
162  
163  
164  
165  
166  
167  
168  
169  
170  
171  
172  
173  
174  
175  
176  
177  
178  
179  
180  
181  
182  
183  
184  
185  
186  
187  
188  
189  
190  
191  
192  
193  
194  
195  
196  
197  
198  
199  
200  
201  
202  
203  
204  
205  
206  
207  
208  
209  
210  
211  
212  
213  
214  
215  
216  
217  
218  
219  
220  
221  
222  
223  
224  
225  
226  
227  
228  
229  
230  
231  
232  
233  
234  
235  
236  
237  
238  
239  
240  
241  
242  
243  
244  
245  
246  
247  
248  
249  
250  
251  
252  
253  
254  
255  
256  
257  
258  
259  
260  
261  
262  
263  
264  
265  
266  
267  
268  
269  
270  
271  
272  
273  
274  
275  
276  
277  
278  
279  
280  
281  
282  
283  
284  
285  
286  
287  
288  
289  
290  
291  
292  
293  
294  
295  
296  
297  
298  
299  
300  
301  
302  
303  
304  
305  
306  
307  
308  
309  
310  
311  
312  
313  
314  
315  
316  
317  
318  
319  
320  
321  
322  
323  
324  
325  
326  
327  
328  
329  
330  
331  
332  
333  
334  
335  
336  
337  
338  
339  
340  
341  
342  
343  
344  
345  
346  
347  
348  
349  
350  
351  
352  
353  
354  
355  
356  
357  
358  
359  
360  
361  
362  
363  
364  
365  
366  
367  
368  
369  
370  
371  
372  
373  
374  
375  
376  
377  
378  
379  
380  
381  
382  
383  
384  
385  
386  
387  
388  
389  
390  
391  
392  
393  
394  
395  
396  
397  
398  
399  
400  
401  
402  
403  
404  
405  
406  
407  
408  
409  
410  
411  
412  
413  
414  
415  
416  
417  
418  
419  
420  
421  
422  
423  
424  
425  
426  
427  
428  
429  
430  
431  
432  
433  
434  
435  
436  
437  
438  
439  
440  
441  
442  
443  
444  
445  
446  
447  
448  
449  
450  
451  
452  
453  
454  
455  
456  
457  
458  
459  
460  
461  
462  
463  
464  
465  
466  
467  
468  
469  
470  
471  
472  
473  
474  
475  
476  
477  
478  
479  
480  
481  
482  
483  
484  
485  
486  
487  
488  
489  
490  
491  
492  
493  
494  
495  
496  
497  
498  
499  
500  
501  
502  
503  
504  
505  
506  
507  
508  
509  
510  
511  
512  
513  
514  
515  
516  
517  
518  
519  
520  
521  
522  
523  
524  
525  
526  
527  
528  
529  
530  
531  
532  
533  
534  
535  
536  
537  
538  
539  
540  
541  
542  
543  
544  
545  
546  
547  
548  
549  
550  
551  
552  
553  
554  
555  
556  
557  
558  
559  
560  
561  
562  
563  
564  
565  
566  
567  
568  
569  
570  
571  
572  
573  
574  
575  
576  
577  
578  
579  
580  
581  
582  
583  
584  
585  
586  
587  
588  
589  
590  
591  
592  
593  
594  
595  
596  
597  
598  
599  
600  
601  
602  
603  
604  
605  
606  
607  
608  
609  
610  
611  
612  
613  
614  
615  
616  
617  
618  
619  
620  
621  
622  
623  
624  
625  
626  
627  
628  
629  
630  
631  
632  
633  
634  
635  
636  
637  
638  
639  
640  
641  
642  
643  
644  
645  
646  
647  
648  
649  
650  
651  
652  
653  
654  
655  
656  
657  
658  
659  
660  
661  
662  
663  
664  
665  
666  
667  
668  
669  
670  
671  
672  
673  
674  
675  
676  
677  
678  
679  
680  
681  
682  
683  
684  
685  
686  
687  
688  
689  
690  
691  
692  
693  
694  
695  
696  
697  
698  
699  
700  
701  
702  
703  
704  
705  
706  
707  
708  
709  
710  
711  
712  
713  
714  
715  
716  
717  
718  
719  
720  
721  
722  
723  
724  
725  
726  
727  
728  
729  
730  
731  
732  
733  
734  
735  
736  
737  
738  
739  
740  
741  
742  
743  
744  
745  
746  
747  
748  
749  
750  
751  
752  
753  
754  
755  
756  
757  
758  
759  
760  
761  
762  
763  
764  
765  
766  
767  
768  
769  
770  
771  
772  
773  
774  
775  
776  
777  
778  
779  
780  
781  
782  
783  
784  
785  
786  
787  
788  
789  
790  
791  
792  
793  
794  
795  
796  
797  
798  
799  
800  
801  
802  
803  
804  
805  
806  
807  
808  
809  
810  
811  
812  
813  
814  
815  
816  
817  
818  
819  
820  
821  
822  
823  
824  
825  
826  
827  
828  
829  
830  
831  
832  
833  
834  
835  
836  
837  
838  
839  
840  
841  
842  
843  
844  
845  
846  
847  
848  
849  
850  
851  
852  
853  
854  
855  
856  
857  
858  
859  
860  
861  
862  
863  
864  
865  
866  
867  
868  
869  
870  
871  
872  
873  
874  
875  
876  
877  
878  
879  
880  
881  
882  
883  
884  
885  
886  
887  
888  
889  
890  
891  
892  
893  
894  
895  
896  
897  
898  
899  
900  
901  
902  
903  
904  
905  
906  
907  
908  
909  
910  
911  
912  
913  
914  
915  
916  
917  
918  
919  
920  
921  
922  
923  
924  
925  
926  
927  
928  
929  
930  
931  
932  
933  
934  
935  
936  
937  
938  
939  
940  
941  
942  
943  
944  
945  
946  
947  
948  
949  
950  
951  
952  
953  
954  
955  
956  
957  
958  
959  
960  
961  
962  
963  
964  
965  
966  
967  
968  
969  
970  
971  
972  
973  
974  
975  
976  
977  
978  
979  
980  
981  
982  
983  
984  
985  
986  
987  
988  
989  
990  
991  
992  
993  
994  
995  
996  
997  
998  
999  
1000

1  
2  
3 *Sci Total Environ.* 2020 Jun 2;738:139825. doi:10.1016/j.scitotenv.2020.139825.  
4

5 **19.** Jüni P, Rothenbühler M, Bobos P, et al. Impact of climate and public health interventions  
6 on the COVID-19 pandemic: a prospective cohort study. *CMAJ.* 2020 May 8;cmaj.200920.  
7

8  
9 doi:10.1503/cmaj.200920.  
10  
11  
12  
13  
14  
15  
16  
17  
18  
19  
20  
21  
22  
23  
24  
25  
26  
27  
28  
29  
30  
31  
32  
33  
34  
35  
36  
37  
38  
39  
40  
41  
42  
43  
44  
45  
46  
47  
48  
49  
50  
51  
52  
53  
54  
55  
56  
57  
58  
59  
60

For peer review only

**Table 1. French County Demographics and Covid-19–Linked Death Data**

| Parameter                              | Mean     | SD       | 95% CI              | Median (1 <sup>st</sup> -3 <sup>rd</sup> quartile) |
|----------------------------------------|----------|----------|---------------------|----------------------------------------------------|
| Population                             | 686736.9 | 520296.7 | [580169.8-793304.0] | 543636.5 (306500.5-887016.7)                       |
| In-hospital deaths                     | 194.8    | 288.1    | [135.8-253.8]       | 80.5 (34.5-191)                                    |
| In-hospital death rate*                | 24.1     | 23.2     | [19.4-28.9]         | 14.1 (8.6-33.8)                                    |
| Density (inhabitants/km <sup>2</sup> ) | 575.8    | 2471.9   | [69.51082.1]        | 85.4 (51.6-165.9)                                  |
| Age >59 y (%)                          | 29.5     | 4.8      | [28.5-30.5]         | 29.4 (26.4-33.2)                                   |
| Male sex (%)                           | 48.4     | 0.5      | [48.3-48.5]         | 48.5 (48.1-48.8)                                   |

\*Number per 100 000 inhabitants.

**Table 2. Demographic and Covid-19–Linked Deaths Data According to Climate Zone**

| Climate zone | Counties, No. (%) | Population, mean | Population, density mean* | Age >59 y, mean (%) | Male sex, mean (%) | In-hospital deaths, mean | In-hospital death rate**, mean |
|--------------|-------------------|------------------|---------------------------|---------------------|--------------------|--------------------------|--------------------------------|
| Zone H1a     | 18 (19)           | 1193507.1        | 2583.9                    | 24.1                | 48.4               | 517.3                    | 39.2                           |
| Zone H1b     | 15 (16)           | 473311.2         | 100.8                     | 29.4                | 48.7               | 258.3                    | 51.2                           |
| Zone H1c     | 18 (19)           | 551782.5         | 105.1                     | 30.1                | 48.5               | 120.5                    | 18.3                           |
| Zone H2      | 36 (38)           | 529843.7         | 80.4                      | 31.6                | 48.4               | 50.6                     | 10.2                           |
| Zone H3      | 7 (7)             | 994859.8         | 187.6                     | 31.0                | 47.7               | 161.7                    | 14.0                           |

\*Inhabitants/land area

\*\*Number per 100 000 inhabitants.

**Table 3. Statistical Analyses of In-Hospital Death Rates: Bivariate Analysis then Multivariate Analysis (Multiple-Linear Regression Excluding Outliers with Categorized Quantitative Data)**

| Factor                                | Statistical test      | In-hospital mortality rate* |        | Correlation coefficient | P value                |
|---------------------------------------|-----------------------|-----------------------------|--------|-------------------------|------------------------|
|                                       |                       | Mean                        | Median |                         |                        |
| <b>Bivariate Analysis</b>             |                       |                             |        |                         |                        |
| Zone H1a                              | Kruskall-Wallis       | 39.2                        | 37.6   | –                       | $8.84 \times 10^{-10}$ |
| Zone H1b                              |                       | 51.2                        | 46.6   | –                       |                        |
| Zone H1c                              |                       | 18.3                        | 14.3   | –                       |                        |
| Zone H2                               |                       | 10.2                        | 8.1    | –                       |                        |
| Zone H3                               |                       | 14.0                        | 12.2   | –                       |                        |
| Density                               | Pearson's correlation | –                           | –      | 0.39                    | $9.42 \times 10^{-5}$  |
| Age >59 y, %                          |                       | –                           | –      | –0.45                   | $5.36 \times 10^{-6}$  |
| <b>Multivariate Analysis</b>          |                       |                             |        | Regression              | P value                |
| (reference Zone H2)                   |                       |                             |        | Coefficient [95% CI]    |                        |
| Zone H1a                              |                       |                             |        | 20.8 [12.0 to 29.6]     | $1.21 \times 10^{-5}$  |
| Zone H1b                              |                       |                             |        | 30.1 [21.3 to 38.9]     | $2.41 \times 10^{-9}$  |
| Zone H1c                              |                       |                             |        | 7.0 [–0.5 to 14.7]      | 0.074                  |
| Zone H3                               |                       |                             |        | –1.4 [–13.1 to 10.1]    | 0.803                  |
| Density >3 <sup>rd</sup> quartile     |                       |                             |        | 8.5 [0.6 to 16.4]       | 0.0361                 |
| Age >59 y >3 <sup>rd</sup> quartile   |                       |                             |        | –3.8 [–10.6 to 2.9]     | 0.272                  |
| Male sex, % >3 <sup>rd</sup> quartile |                       |                             |        | –2.5 [–8.4 to 3.3]      | 0.399                  |

\*Number per 100 000 inhabitants.

## Figure legends

**Figure 1.** Main Climate Zones (H1a, H1b, H1c, H2, H3) of Continental France

Administrative Areas (“Départements”).

**Figure 2.** Boxplots of In-Hospital Mortality Rates According to the Main Climate Zones (A).

The internal bold horizontal line is the median; the lower and upper box limits are the 5<sup>th</sup> and 95<sup>th</sup> percentiles, respectively; and the T-bars represent range. Multivariate linear-regression analysis (B) (95% confidence intervals CI; with H2 serving as the reference). The analysis retained climate zones (H1a, H1b) and population density as independent factors significantly influencing in-hospital mortality.

1  
2  
3  
4  
5  
6  
7  
8  
9  
10  
11  
12  
13  
14  
15  
16  
17  
18  
19  
20  
21  
22  
23  
24  
25  
26  
27  
28  
29  
30  
31  
32  
33  
34  
35  
36  
37  
38  
39  
40  
41  
42  
43  
44  
45  
46  
47  
48  
49  
50  
51  
52  
53  
54  
55  
56  
57  
58  
59  
60

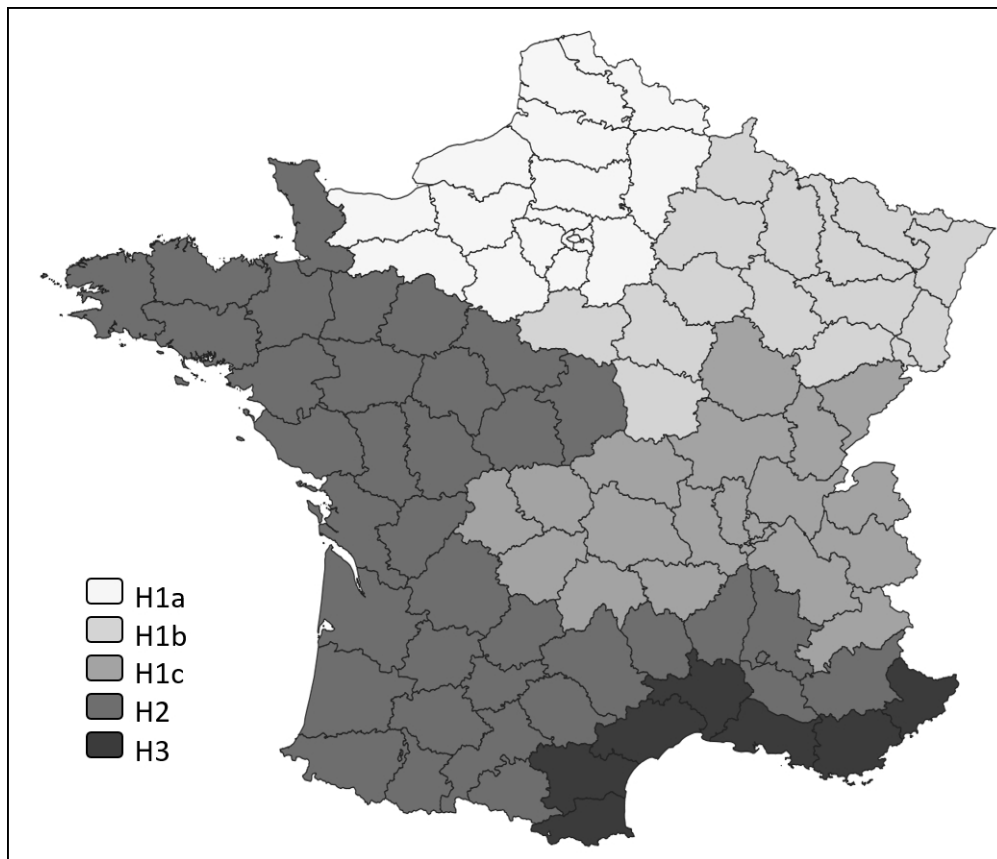

Figure 1. Main Climate Zones (H1a, H1b, H1c, H2, H3) of Continental France Administrative Areas ("Départements").

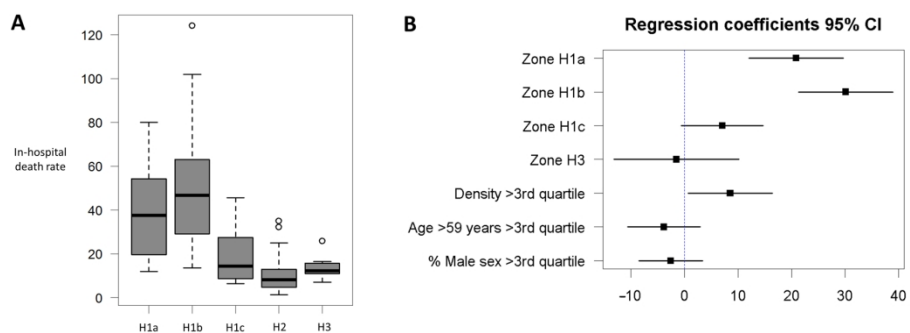

Figure 2. Boxplots of In-Hospital Mortality Rates According to the Main Climate Zones (A). The internal bold horizontal line is the median; the lower and upper box limits are the 1st and 3rd quartile, respectively; and the T-bars represent range. Multivariate linear-regression analysis (B) (95% confidence intervals CI; with H2 serving as the reference). The analysis retained climate zones (H1a, H1b) and population density as independent factors significantly influencing in-hospital mortality.

STROBE Statement—Checklist of items that should be included in reports of *cross-sectional studies*

|                              | Item No | Recommendation                                                                                                                                                                                               | Page No      |
|------------------------------|---------|--------------------------------------------------------------------------------------------------------------------------------------------------------------------------------------------------------------|--------------|
| <b>Title and abstract</b>    | 1       | (a) Indicate the study's design with a commonly used term in the title or the abstract                                                                                                                       | 1            |
|                              |         | (b) Provide in the abstract an informative and balanced summary of what was done and what was found                                                                                                          | 2            |
| <b>Introduction</b>          |         |                                                                                                                                                                                                              |              |
| Background/rationale         | 2       | Explain the scientific background and rationale for the investigation being reported                                                                                                                         | 4            |
| Objectives                   | 3       | State specific objectives, including any prespecified hypotheses                                                                                                                                             | 4            |
| <b>Methods</b>               |         |                                                                                                                                                                                                              |              |
| Study design                 | 4       | Present key elements of study design early in the paper                                                                                                                                                      | 5            |
| Setting                      | 5       | Describe the setting, locations, and relevant dates, including periods of recruitment, exposure, follow-up, and data collection                                                                              | 5            |
| Participants                 | 6       | (a) Give the eligibility criteria, and the sources and methods of selection of participants                                                                                                                  | 5            |
| Variables                    | 7       | Clearly define all outcomes, exposures, predictors, potential confounders, and effect modifiers. Give diagnostic criteria, if applicable                                                                     | 5            |
| Data sources/<br>measurement | 8*      | For each variable of interest, give sources of data and details of methods of assessment (measurement). Describe comparability of assessment methods if there is more than one group                         | 5            |
| Bias                         | 9       | Describe any efforts to address potential sources of bias                                                                                                                                                    | 5            |
| Study size                   | 10      | Explain how the study size was arrived at                                                                                                                                                                    | 5            |
| Quantitative variables       | 11      | Explain how quantitative variables were handled in the analyses. If applicable, describe which groupings were chosen and why                                                                                 | 5            |
| Statistical methods          | 12      | (a) Describe all statistical methods, including those used to control for confounding                                                                                                                        | 6            |
|                              |         | (b) Describe any methods used to examine subgroups and interactions                                                                                                                                          | 6            |
|                              |         | (c) Explain how missing data were addressed                                                                                                                                                                  | NA           |
|                              |         | (d) If applicable, describe analytical methods taking account of sampling strategy                                                                                                                           |              |
|                              |         | (e) Describe any sensitivity analyses                                                                                                                                                                        | NA           |
| <b>Results</b>               |         |                                                                                                                                                                                                              |              |
| Participants                 | 13*     | (a) Report numbers of individuals at each stage of study—eg numbers potentially eligible, examined for eligibility, confirmed eligible, included in the study, completing follow-up, and analysed            | NA           |
|                              |         | (b) Give reasons for non-participation at each stage                                                                                                                                                         | NA           |
|                              |         | (c) Consider use of a flow diagram                                                                                                                                                                           | NA           |
| Descriptive data             | 14*     | (a) Give characteristics of study participants (eg demographic, clinical, social) and information on exposures and potential confounders                                                                     | 6            |
|                              |         | (b) Indicate number of participants with missing data for each variable of interest                                                                                                                          | NA           |
| Outcome data                 | 15*     | Report numbers of outcome events or summary measures                                                                                                                                                         | 6            |
| Main results                 | 16      | (a) Give unadjusted estimates and, if applicable, confounder-adjusted estimates and their precision (eg, 95% confidence interval). Make clear which confounders were adjusted for and why they were included | 6, 7, 16, 17 |



|                          |    |                                                                                                                                                                            |    |
|--------------------------|----|----------------------------------------------------------------------------------------------------------------------------------------------------------------------------|----|
|                          |    | (b) Report category boundaries when continuous variables were categorized                                                                                                  | NA |
|                          |    | (c) If relevant, consider translating estimates of relative risk into absolute risk for a meaningful time period                                                           | NA |
| Other analyses           | 17 | Report other analyses done—eg analyses of subgroups and interactions, and sensitivity analyses                                                                             | NA |
| <b>Discussion</b>        |    |                                                                                                                                                                            |    |
| Key results              | 18 | Summarise key results with reference to study objectives                                                                                                                   | 7  |
| Limitations              | 19 | Discuss limitations of the study, taking into account sources of potential bias or imprecision. Discuss both direction and magnitude of any potential bias                 | 12 |
| Interpretation           | 20 | Give a cautious overall interpretation of results considering objectives, limitations, multiplicity of analyses, results from similar studies, and other relevant evidence | 9  |
| Generalisability         | 21 | Discuss the generalisability (external validity) of the study results                                                                                                      | 11 |
| <b>Other information</b> |    |                                                                                                                                                                            |    |
| Funding                  | 22 | Give the source of funding and the role of the funders for the present study and, if applicable, for the original study on which the present article is based              | 1  |

\*Give information separately for exposed and unexposed groups.

**Note:** An Explanation and Elaboration article discusses each checklist item and gives methodological background and published examples of transparent reporting. The STROBE checklist is best used in conjunction with this article (freely available on the Web sites of PLoS Medicine at <http://www.plosmedicine.org/>, Annals of Internal Medicine at <http://www.annals.org/>, and Epidemiology at <http://www.epidem.com/>). Information on the STROBE Initiative is available at [www.strobe-statement.org](http://www.strobe-statement.org).

# BMJ Open

## COVID-19–related in-hospital mortality in continental France administrative areas is linked to weather: an ecological study

|                                 |                                                                                     |
|---------------------------------|-------------------------------------------------------------------------------------|
| Journal:                        | <i>BMJ Open</i>                                                                     |
| Manuscript ID                   | bmjopen-2020-043269.R1                                                              |
| Article Type:                   | Original research                                                                   |
| Date Submitted by the Author:   | 23-Dec-2020                                                                         |
| Complete List of Authors:       | mejdoubi, mehdi; Centre Hospitalier de Valenciennes, djennaoui, mehdi kyndt, xavier |
| <b>Primary Subject Heading</b>: | Epidemiology                                                                        |
| Secondary Subject Heading:      | Public health, Infectious diseases                                                  |
| Keywords:                       | COVID-19, Epidemiology < INFECTIOUS DISEASES, INFECTIOUS DISEASES                   |
|                                 |                                                                                     |

SCHOLARONE™  
Manuscripts



I, the Submitting Author has the right to grant and does grant on behalf of all authors of the Work (as defined in the below author licence), an exclusive licence and/or a non-exclusive licence for contributions from authors who are: i) UK Crown employees; ii) where BMJ has agreed a CC-BY licence shall apply, and/or iii) in accordance with the terms applicable for US Federal Government officers or employees acting as part of their official duties; on a worldwide, perpetual, irrevocable, royalty-free basis to BMJ Publishing Group Ltd ("BMJ") its licensees and where the relevant Journal is co-owned by BMJ to the co-owners of the Journal, to publish the Work in this journal and any other BMJ products and to exploit all rights, as set out in our [licence](#).

The Submitting Author accepts and understands that any supply made under these terms is made by BMJ to the Submitting Author unless you are acting as an employee on behalf of your employer or a postgraduate student of an affiliated institution which is paying any applicable article publishing charge ("APC") for Open Access articles. Where the Submitting Author wishes to make the Work available on an Open Access basis (and intends to pay the relevant APC), the terms of reuse of such Open Access shall be governed by a Creative Commons licence – details of these licences and which [Creative Commons](#) licence will apply to this Work are set out in our licence referred to above.

Other than as permitted in any relevant BMJ Author's Self Archiving Policies, I confirm this Work has not been accepted for publication elsewhere, is not being considered for publication elsewhere and does not duplicate material already published. I confirm all authors consent to publication of this Work and authorise the granting of this licence.

1  
2  
3 1 **COVID-19–related in-hospital mortality in continental France administrative areas is**  
4  
5 2 **linked to weather: an ecological study**  
6  
7  
8 3  
9

10 4 Mehdi Mejdoubi iD,<sup>1</sup> Mehdi Djennaoui,<sup>2</sup> Xavier Kyndt<sup>2</sup>  
11  
12 5

13  
14  
15 6 <sup>1</sup>Department of Radiology, Hospital of Valenciennes, Valenciennes, France.  
16

17 7 <sup>2</sup>Department of Public Health, Hospital of Valenciennes, Valenciennes, France.  
18  
19 8

20  
21 9 **Correspondence to**  
22

23  
24 10 Prof Mehdi Mejdoubi, Department of Radiology, Hospital of Valenciennes, CS 50479, 59322  
25  
26 11 Valenciennes Cedex, France. Tel: +33 3 27 14 50 24; Fax: +33 3 37 14 35 80; Email:  
27  
28 12 mejdoubi-m@ch-valenciennes.fr  
29  
30  
31 13

32  
33 14 **Keywords:** COVID-19, outbreak, pandemic, risk factors, weather  
34  
35 15

36  
37 16 **Word count:** 2504  
38  
39  
40 17  
41  
42  
43  
44  
45  
46  
47  
48  
49  
50  
51  
52  
53  
54  
55  
56  
57  
58  
59  
60

1  
2  
3 **1 ABSTRACT**  
4

5 **2 Objective** To assess the effect of a weather index on in-hospital COVID-19–linked deaths.  
6

7 **3 Design** Ecological study.  
8

9  
10 **4 Setting** Continental France administrative areas (*départements*; henceforth counties). The  
11  
12 study period, from 18 March to 30 May 2020, corresponds to the main first outbreak period in  
13  
14 France.  
15

16  
17 **7 Population** COVID-19–linked in-hospital deaths.  
18

19 **8 Main outcome measures** In-hospital deaths and demographics (population, human density,  
20  
21 male sex and population percentage >59 years old) were obtained from national and  
22  
23 centralised public databases. County weather indexes were calculated by the French National  
24  
25 Meteorological Agency.  
26  
27

28 **12 Methods** In this observational, ecological study, the relationship between in-hospital COVID-  
29  
30 19–related mortality and climate zones in continental French counties were analysed, by  
31  
32 comparing the cumulative in-hospital death tolls in France by county to other factors  
33  
34 (population density, climate, age and sex). The study period lasted from 18 March to 30 May  
35  
36 2020. A multivariate linear-regression analysis of in-hospital mortality included climate  
37  
38 zones, population density, population >59 years old and percentages of males as potential  
39  
40 predictors. The significance level was set at 5%.  
41  
42  
43

44 **19 Results** Weather indicators and population density were factors independently associated with  
45  
46 the COVID-19 death toll. Colder counties had significantly higher mortality rates  
47  
48 ( $p<0.00001$ ). Percentages of males and population >59 years old in counties did not affect  
49  
50 COVID-19 in-hospital mortality.  
51  
52

53 **23 Conclusions** Many parameters influence COVID-19 outbreak-severity indicators. Population  
54  
55 density is a strong factor but its exact importance is difficult to discern. Weather (mainly cold  
56  
57 winter temperatures) was independently associated with mortality and could help explain  
58  
59  
60

1 outbreak dynamics, which began and were initially more severe in the coldest counties of  
2 continental France. Weather partly explains fatality-rate discrepancies observed worldwide.

#### 4 **Strengths and limitations of this study**

- 5 • This ecological study is based on a country with data reliability, different climate  
6 zones and homogeneous social conduct during the study period.
- 7 • French continental administrative areas include coastal, non-coastal and other counties  
8 with cold winters.
- 9 • Climate, as a new independent factor, should be included in predictive modelisation of  
10 COVID-19 outbreaks.
- 11 • Generalisability of our results is mainly valid for temperate climates.
- 12 • Due to the ecological design of the study, we were unable to control for co-morbidities in  
13 the multivariate analysis.

## 17 **INTRODUCTION**

18 The world is experiencing a major novel coronavirus disease-2019 (COVID-19) pandemic  
19 since December 2019, with >1 570 000 deaths (as of 10 December 2020).[1] In France, the  
20 outbreak began in early March 2020 in the Alsace “*Département*” (an administrative area  
21 comparable to a county in the US and UK; henceforth county), quickly spread throughout  
22 continental France, with the major hotspot being Paris and its suburbs.[2] The national  
23 lockdown, started 17 March 2020, achieved flattening of the infection-outbreak curve (with  
24 the mortality peak reached on 6 April) and was eased on 11 May 2020.[2] Deaths exceeded  
25 30 000 during the first wave and, although the outbreak seemed to be under control during the

1 summer, a second wave started in October 2020.

2 Severe acute respiratory syndrome coronavirus-2 (SARS-CoV-2) transmission causes  
3 COVID-19. All epidemics are the result of multiple factors, like population density, human  
4 displacements and individual human susceptibility (age, co-morbidities, etc.). The question  
5 remains whether meteorological parameters are an independent factor of disease transmission  
6 and/or severity. Epidemiological studies are often biased by the imprecise results of large-  
7 scale biological testing, which has only recently been fully implemented in France. In-hospital  
8 deaths are a more reliable data source, even though it encompasses different types of patients  
9 (some intensively treated, other just receiving palliative care).

10 This study was undertaken to explore the relationship between COVID-19-linked in-  
11 hospital deaths, at the county level, and weather indicators.

12

## 13 **METHODS**

### 14 **Population**

15 In this observational, ecological study, the relationship between in-hospital, COVID-19-  
16 linked mortality and climate zones in 94 continental French counties areas was analysed. The  
17 overseas territories and Corsica were excluded from the analysis because of their particular  
18 localisations (with tropical or subtropical climate for some) and special insular conditions (for  
19 some). The study period lasted from 18 March to 30 May 2020.

20

### 21 **Data**

22 We compared the cumulative in-hospital death tolls in continental France (64 million  
23 inhabitants) by county to other factors (population density, climate, age and sex). The 18 314  
24 deaths in France during the observation period classified by county were obtained from the  
25 French open-source database (*Santé Publique France*).[3] On 31 May and throughout June

1 2020, respectively, 35 and 888 additional in-hospital deaths were not considered for the study.

2 In France, access to healthcare is free and during this outbreak, there was no shortage of  
3 available conventional or ICU hospital beds. In-hospital deaths in France are assigned to the  
4 areas where the deceased persons lived.

5 The following demographic characteristics for each county were obtained from the  
6 French Institute for Statistics and Epidemiology (INSEE)[4]: total population, percentage of  
7 the population >59 years (INSEE categorises oldest populations in only two classes: 60–74  
8 and ≥75 years old), percentage of males in the population and human density per km<sup>2</sup>.

9 To assess the climate conditions, the French counties were classified according to a  
10 French Climate Severity Index (*Indice de Rigueur Climatique*).[5] That Index is calculated  
11 (from local measurements in each zone) by the French National Meteorological Agency.  
12 Three main climate patterns (H1, H2, H3; figure 1) are defined according to winter  
13 temperatures, with H1 representing the coldest zone and H3 the warmest. Regional H2 zones  
14 are known to be homogeneous, which contrasts with H1 zones, sub-characterised according to  
15 summer temperatures and coastal influence into H1a, H1b, H1c (with H1b being colder in  
16 winter and hotter in summer than H1a). These zones are ranked according to winter  
17 temperatures from coldest to warmest: H1b>H1a>H1c>H2>H3. The data used were collected  
18 historically and are not from winter 2020.

## 20 **Statistical Analyses**

21 All database variables were tested. Bivariate analyses were computed between in-hospital  
22 COVID-19-related mortality, and each weather indicator and each demographic parameter  
23 (density, age, sex). For comparisons, the Kruskal–Wallis test and Pearson's correlation test  
24 were used, as appropriate. The significance level was set at 5%. Those bivariate analyses were  
25 also completed by multivariate linear-regression analysis (first multivariate model). The



1 statistical quality of the model was assessed with the variance–covariance matrix of residuals  
 2 and normality for their distribution. Data were analysed by Cook’s distance, which showed  
 3 three counties with outliers: Paris (which received patients from its suburbs because, as the  
 4 nation’s capital, it has a disproportionately higher hospital density), Haut-Rhin and Belfort  
 5 (eastern France, where the outbreak began). Therefore, a second multivariate model excluding  
 6 outliers was built, which had a more homogeneous distribution of residuals. The multivariate  
 7 analysis was finalised by a multiple linear-regression model excluding outliers, with  
 8 categorisation of quantitative data into binary variables using the third quartile as the  
 9 threshold value (third model). The statistical analyses were computed with R software version  
 10 4.0.0.

## 12 Patient and public involvement

13 No patients were directly involved in this study.

## 15 RESULTS

16 Demographic and hospital data characteristics during the study period are reported **table 1**.

18 **Table 1** French county demographic and COVID-19–linked mortality data

| Parameter                                         | Mean      | SD        | 95% CI                | Median (1 <sup>st</sup> –3 <sup>rd</sup> quartile) |
|---------------------------------------------------|-----------|-----------|-----------------------|----------------------------------------------------|
| Population                                        | 686 736.9 | 520 296.7 | [580 169.8–793 304.0] | 543 636.5 (306 500.5–887 016.7)                    |
| In-hospital deaths                                | 194.8     | 288.1     | [135.8–253.8]         | 80.5 (34.5–191)                                    |
| In-hospital death rate*                           | 24.1      | 23.2      | [19.4–28.9]           | 14.1 (8.6–33.8)                                    |
| Population density (inhabitants/km <sup>2</sup> ) | 575.8     | 2471.9    | [69.5–1082.1]         | 85.4 (51.6–165.9)                                  |
| Age >59 years (%)                                 | 29.5      | 4.8       | [28.5–30.5]           | 29.4 (26.4–33.2)                                   |
| Male sex (%)                                      | 48.4      | 0.5       | [48.3–48.5]           | 48.5 (48.1–48.8)                                   |

19 \*Number per 100 000 inhabitants.

20 SD, standard deviation; CI, confidence interval

Bivariate analysis demonstrated a significant link between in-hospital COVID-19-related mortality and climate zone (figure 2A). Mean (standard deviation) mortality rates for climate zones H1a (table 2), H1b, H1c, H2 and H3 differed significantly ( $p=8.84 \times 10^{-10}$ ).

**Table 2** French demographic and COVID-19-linked mortality data according to climate zone

| Climate zone | Counties, No. (%) | Population, mean | Population, density mean* | Age >59 y mean (%) | Male sex, mean (%) | In-hospital deaths, mean | In-hospital death rate†, mean (SD) |
|--------------|-------------------|------------------|---------------------------|--------------------|--------------------|--------------------------|------------------------------------|
| H1a          | 18 (19)           | 1 193 507.1      | 2583.9                    | 24.1               | 48.4               | 517.3                    | 39.2 (21.8)                        |
| H1b          | 15 (16)           | 473 311.2        | 100.8                     | 29.4               | 48.7               | 258.3                    | 51.2 (31.4)                        |
| H1c          | 18 (19)           | 551 782.5        | 105.1                     | 30.1               | 48.5               | 120.5                    | 18.3 (11.8)                        |
| H2           | 36 (38)           | 529 843.7        | 80.4                      | 31.6               | 48.4               | 50.6                     | 10.2 (8.2)                         |
| H3           | 7 (7)             | 994 859.8        | 187.6                     | 31.0               | 47.7               | 161.7                    | 14.0 (6.0)                         |

\*Inhabitants/land area.

†Number per 100 000 inhabitants.

SD, standard deviation.

Bivariate analysis (correlation coefficients) also found significant independent statistical links between COVID-19-related mortality and population density or age >59 years but not male sex (table 3).

**Table 3** Bivariate and multivariate analyses of in-hospital death rates\*

| Factor                    | In-hospital mortality rate† |              | Correlation coefficient | p value                |
|---------------------------|-----------------------------|--------------|-------------------------|------------------------|
|                           | Mean (SD)                   | Median (IQR) |                         |                        |
| <b>Bivariate Analysis</b> |                             |              |                         |                        |
| Zone H1a‡                 | 39.2 (21.8)                 | 37.6 (32.9–) | –                       | $8.84 \times 10^{-10}$ |
| Zone H1b‡                 | 51.2 (31.4)                 | 46.6 (34.0–) | –                       |                        |
| Zone H1c‡                 | 18.3 (11.8)                 | 14.3 (17.2–) | –                       |                        |

|                                              |            |             |                             |                       |
|----------------------------------------------|------------|-------------|-----------------------------|-----------------------|
| Zone H2†                                     | 10.2 (8.2) | 8.1 (7.9–)  | –                           |                       |
| Zone H3‡                                     | 14.0 (6.0) | 12.2 (4.7–) | –                           |                       |
| Population density§                          | –          | –           | 0.39                        | $9.42 \times 10^{-5}$ |
| Age >59 years, %§                            | –          | –           | –0.45                       | $5.36 \times 10^{-6}$ |
| <b>Multivariate Analysis</b>                 |            |             | <b>Regression</b>           |                       |
| (reference zone H2)                          |            |             | <b>coefficient [95% CI]</b> |                       |
| Zone H1a                                     |            |             | 20.8 [12.0 to 29.6]         | $1.21 \times 10^{-5}$ |
| Zone H1b                                     |            |             | 30.1 [21.3 to 38.9]         | $2.41 \times 10^{-9}$ |
| Zone H1c                                     |            |             | 7.0 [–0.5 to 14.7]          | 0.074                 |
| Zone H3                                      |            |             | –1.4 [–13.1 to 10.1]        | 0.803                 |
| Population density >3 <sup>rd</sup> quartile |            |             | 8.5 [0.6 to 16.4]           | 0.0361                |
| Age >59 years >3 <sup>rd</sup> quartile      |            |             | –3.8 [–10.6 to 2.9]         | 0.272                 |
| Male sex, % >3 <sup>rd</sup> quartile        |            |             | –2.5 [–8.4 to 3.3]          | 0.399                 |

1 \*Multiple-linear regression excluding outliers with categorised quantitative data.

2 †Number per 100 000 inhabitants.

3 ‡Kruskal–Wallis test.

4 §Pearson's correlation test.

5 SD, standard deviation; IQR, interquartile range, 1<sup>st</sup>–3<sup>rd</sup> quartile.

7 According to multivariate analysis of the initial data (using zone H2 as the reference),  
 8 COVID-19-linked mortality was associated with the following parameters: climate zones H1a  
 9 (regression coefficient 14.6,  $p=0.00962$ ) and H1b (regression coefficient 37.2,  $p=4.39 \times 10^{-11}$ ),  
 10 population density (regression coefficient 0.003,  $p=0.000229$ ) and age (regression coefficient  
 11 –0.97,  $p=0.0208$ ) (supplemental appendix 1). Results of the multiple linear-regression model  
 12 excluding outliers (Cook's distance >0.1) were similar, with statistically significant effects for  
 13 climate zones H1a (regression coefficient 15.2,  $p=0.000785$ ) and H1b (regression coefficient  
 14 30.4,  $p=7.65 \times 10^{-11}$ ), population density (regression coefficient 0.004,  $p=0.00028$ ) and age  
 15 (regression coefficient –0.6,  $p=0.0404$ ) (supplemental appendix 2). Residual analyses for the

1 multivariate models using the initial data was less conclusive than that excluding outliers.  
2 After categorisation of quantitative data into binary variables, results remained similar with  
3 statistically significant effects of climate zones H1a and H1b and population density (table 3)  
4 (Figure 2B). The only difference between the third model and the second model was the non-  
5 significance of the age. H3 climate zone and male sex were not significant in any of the three  
6 models constructed.

## 8 **DISCUSSION**

9 Our results showed that COVID-19-related in-hospital mortality—throughout continental  
10 France—was due to at least two independent factors: weather index and population density.  
11 We did not find a difference among counties for the percent population aged >59 years or  
12 male sex. As for any outbreak, the COVID-19 pandemic has multifactorial origins. Some are  
13 already well-documented: individual factors (age, male sex, co-morbidities), high population  
14 density and all types of human displacements. Many others are still being discussed (weather  
15 indicators, socio-economic factors, immune status).

16 Individual risk factors for COVID-19 severity were identified relatively quickly, as this  
17 pathology often requires hospitalisation (with or without ventilation), and it first emerged in  
18 developed countries, after Wuhan, China. The main severity factors reported are: age >50  
19 years, co-morbidities, male sex.[6-8] Co-morbidities are independent factors with a  
20 multivariable odds ratio (OR) ranging from 1.31 (diabetes) to 2.94 (pulmonary disease).[6]  
21 Age is a major independent factor, with a reported multivariable OR of 1.10 per 1-year  
22 increment[7] or 1.31 per 10-year increment[6] and male sex has an OR of 1.13. We attribute  
23 our inability to find an age effect among French counties to: first, only in-hospital deaths were  
24 available according to county and, second, the oldest patients were not systematically  
25 hospitalised (while in-assisted-residence deaths accounted for one-third of the death toll in

1  
2  
3 1 France). Therefore, the among-county differences for those >59-year-old-class deaths were  
4  
5 2 not retrieved from the in-hospital death data. Nevertheless, despite the significantly higher  
6  
7 3 proportion of >59-year-olds in H1c, H2 and H3 climate zones (table 2), in-hospital mortality  
8  
9 4 was significantly higher in H1a zones.

10  
11  
12 5 We did not find male sex to be discriminant among French counties, because they had a  
13  
14 6 mean 48.4% of males with a small standard deviation of 0.5. Ethnicity[9] and socio-economic  
15  
16 7 status have also been evoked as etiological factors but their independence remains to be  
17  
18 8 proven.

19  
20  
21 9 For most epidemics, especially of respiratory diseases, population density is a major  
22  
23 10 cause of transmission. Cities are more affected than rural areas and, within cities,  
24  
25 11 neighbourhoods with dense housing are, unsurprisingly, more affected. The highest death tolls  
26  
27 12 were in big cities (New York, Paris, Madrid, London) and within them, poor neighbourhoods  
28  
29 13 were more severely affected for highly interwoven reasons. However, the ‘number of  
30  
31 14 people/land area’ is a poor indicator of the human-population–density characteristic, as it is  
32  
33 15 embedded in a wide variety of situations (housing mode, transportation mode, inner-city  
34  
35 16 density, human interactions, cultural and behavioural habits). Indeed, many outbreaks  
36  
37 17 occurred on (cruise or military) ships,[10] likely due to the same combined effect of closed  
38  
39 18 environment and prolonged contact. Thus, the Diamond Princess cruise was classified among  
40  
41 19 the most affected ‘entities’ at the beginning of the pandemic in March 2020.[11] That said,  
42  
43 20 cruise ships are the perfect laboratory model of outbreak spread in small cities.

44  
45  
46  
47  
48  
49 21 Our results showed human density to be an independent factor for COVID-19–related  
50  
51 22 deaths but we acknowledge that its exact importance cannot be determined, as we are limited  
52  
53 23 by the wide range of situations that human density encompasses, with many factors that  
54  
55 24 should be taken into account. Our assessment of human density (and interactions) was mainly  
56  
57 25 made during a lockdown; therefore, the importance of this factor is likely underestimated  
58  
59  
60

1 herein. Also, population density does not have the same connotation and consequences in  
2 poor and rich countries. The outbreak extension to hot climates indicates that human  
3 interactions are likely even more important for virus spread than weather (unlike our results).

4 The cities gather not only locals but also draws infected people, with airport arrivals  
5 representing the fastest entry point of the outbreak. Since the 1968–69 flu pandemic, we have  
6 known that international travel and plane transportation is a major vector of virus  
7 displacement. According to Liu *et al*,[12] COVID-19 has spread in multiple major cities in  
8 China that have large numbers of inbound and outbound passengers. They used an internet-  
9 based (“Baidu”) Migration Scale Index for 30 cities and found an association with confirmed  
10 cases. Pertinently, population migration and displacement or movement-control measures  
11 implemented (quarantine, limited migration/limited travel/travel bans, closed borders)  
12 reduced virus spread everywhere. In 2019, the top five countries receiving international  
13 tourists were France, Spain, Italy, China and the USA. Those countries were the main ones  
14 affected by the pandemic during March and April 2020. This human-migration dynamic  
15 partly explains the epidemic’s temporality worldwide.[13]

16 Some human behaviours (hand-shaking, cheek-kissing, body contact, crowds),  
17 intrinsically responsible for social-distancing differences, are also likely to influence SARS-  
18 Cov-2 transmission. But, within a small- or medium-sized country (as in France), they may be  
19 relatively homogeneous. It is difficult to individualise these cultural factors, and no clear and  
20 unbiased study indicators have been identified, but they likely account for mortality  
21 discrepancies among countries. For example, massive virus spreading was reported after  
22 carnivals in different settings (New Orleans, Louisiana, and Gangelt, Germany[14]).

23 Viral epidemics, such flu and gastroenteritis, are known to follow seasonal cycles with  
24 resurgences during autumn and winter, favoured by cold temperatures. Previous coronavirus  
25 outbreaks (SARS-CoV-1 and Middle East Respiratory Syndrome) were also linked to

1 weather[12] (mainly temperature). A climate effect on the wide dissemination of a respiratory  
2 disease is a highly intuitive conclusion and SARS-CoV-2 is transmitted mainly through  
3 droplets and aerosols. Temperature, humidity and wind were found to impact the spread of  
4 this outbreak,[12, 15-19] based on confirmed infections. Notably, biological testing is known  
5 to monitor imprecisely this outbreak because 23%–40% of the cases are asymptomatic.[20]  
6 Moreover, false-negative reverse transcriptase-polymerase chain reaction results may occur.  
7 Therefore, our study focused on more precise, in-hospital deaths, collected in a centralised  
8 electronic database.

9 In many countries spanning multiple latitudes, clear north–south gradients[18, 19] were  
10 observed with more deaths further north: France, Spain, Italy, USA (as of 10 December 2020,  
11 New York State had more deaths (35 183) than Florida (19 462),[1] despite Florida having a  
12 larger population and the highest percentage population in the US >65 years old). Notably,  
13 Rome, the largest Italian city with a Mediterranean climate, was proportionally less affected  
14 than northern cities,[19] which have a different climate.

15 Based on our results for continental France, southern and coastal areas seem to be more  
16 protected than colder inland areas. Notably, our findings were confirmed by observations  
17 made in Spain, where the Madrid region was hit harder than coastal and southern zones.  
18 Western Europe (France, UK, Belgium, Netherlands and Germany) has a mainly oceanic  
19 climate and the outbreak followed the same course (sudden rise in March, decline in May and  
20 resumption in October 2020),[1] despite their different public health-policy approaches. Also,  
21 few large cities in East and Southeast Asia (except Wuhan) were COVID-19 pandemic  
22 hotspots, despite human-population density being among the highest in the world. That  
23 observation can be explained by: (1) aggressive management of the epidemic in cold areas  
24 (South Korea, Japan, and China, which implemented the strictest lockdown in the world); (2)  
25 other protective behaviours, including traditional cultural distancing; (3) some protective

1 climate effect in warm areas (Hong Kong, Singapore, Taiwan). Of course, the combination of  
2 these three factors would achieve the highest protection.

3 Pertinently, the climate's protective effect alone would not spare a population from the  
4 outbreak and, indeed, almost all countries on earth have been impacted. Moreover, the  
5 protection afforded by higher temperatures remains to be precisely defined depending on the  
6 climate, because the interactions among temperature, humidity, wind and sunlight are  
7 complex. Still, Prata *et al*[21] showed that, in Brazil, the climate's effect may exist, even in  
8 tropical regions, where the range of temperatures is limited. Inversely, the results of Hallal *et*  
9 *al*'s [22] nationwide antibody-prevalence survey in Brazil showed that the most affected areas  
10 were located along the Amazon river, which has the warmest climate. They explained those  
11 findings by human density on boats, the major means of transporting people, and excess  
12 multifactorial risks among indigenous populations.

13 Air pollution also was shown to be associated with virus spread in northern Italy,[23] but  
14 because pollution is closely related to weather conditions, its independent role remains to be  
15 specified.

16 Public health strategies have been extensively implemented worldwide.[24] It is likely  
17 that climate alone is not sufficient to extinguish this outbreak, and public health interventions,  
18 aimed at containing and reducing virus circulation, will be needed on a long-term basis.

19 Weather factors and human social behaviours (partly linked to meteorological conditions)  
20 seem to contribute to COVID-19 epidemiological dynamics. This multifactorial character  
21 could explain why, despite some climate protection, some warm areas in Central and South  
22 America are experiencing massive epidemics. Notably, their national strategies implemented  
23 only partial social distancing and, even now, persist in opposing it (Brazil,[22] Mexico). Liu  
24 *et al*[12] concluded rightly for China: "this epidemic will be faded to a large degree in the  
25 coming warmer season with the enforcement of public health interventions in China," which



1 emphasises the absolute need for social distancing and not to rely solely on a weather effect.

2

### 3 **Strengths and Limitations**

4 Few countries have simultaneous hospital-data reliability, different climate zones,  
5 homogeneous social behaviour during the outbreak (including a uniformly implemented  
6 lockdown) and high COVID-19-related mortality. France met all those conditions. However,  
7 our study has some limitations. First, the death-toll breakdown per county is available only for  
8 in-hospital deaths. Second, the impact of each etiological factor may vary among different  
9 countries and climates, therefore, generalisability of our results is mainly valid for temperate  
10 countries in the northern hemisphere. Third, the France weather index we used provided a  
11 historic collection of weather data, but not winter 2019–2020 conditions. Finally, co-  
12 morbidities could not be analysed because of the ecological design of the study but we think  
13 that their distribution is relatively homogeneous among French counties.

### 15 **Conclusion**

16 Our findings suggest that climate is an independent factor influencing COVID-19-linked  
17 mortality at the county level in continental France. Human-population density (and therefore  
18 social interactions) is an independent factor, whose impact has been widely proven. These  
19 factors, along with others (age pyramid, cultural factors, co-morbidities), explain the course of  
20 this pandemic throughout the world. The fatality discrepancies among countries and among  
21 administrative subdivisions within countries likely follow the same rules worldwide. Our  
22 findings also imply that this COVID-19 outbreak will last throughout the coldest periods, but  
23 seasonality is complex, as it involves more than climate alone (eg, immune status, virus  
24 mutation).

25

1  
2  
3 1 **Acknowledgements** none  
4

5 2 **Contributors** MM: conceptualisation, methodology, data curation, writing original draft. XK:

6  
7 methodology, writing, manuscript editing. MD: methodology, software, data curation,

8  
9 writing, manuscript editing.  
10

11  
12 5 **Funding** There was no funding source for this study.  
13

14  
15 6 **Competing interests** The authors report no potential conflicts of interest.  
16

17  
18 7 **Patient and public involvement** Patients and/or the public were not involved in

19  
20 8 the design, or conduct, or reporting, or dissemination plans of this research.  
21

22  
23 9 **Data availability statement** Weather data and epidemiological data are all available free-of-

24  
25 10 charge from public databases.  
26

27  
28 11 **Supplemental material** This material has been supplied by the authors. It has not been vetted

29  
30 12 by BMJ Publishing Group Limited (BMJ) and may not have been peer-reviewed. Any

31  
32 13 opinions or recommendations discussed are solely those of the authors and are not endorsed

33  
34 14 by BMJ. BMJ disclaims all liability and responsibility arising from any reliance placed on the

35  
36 15 content. Where the content includes any translated material, BMJ does not warrant the

37  
38 16 accuracy and reliability of the translations (including but not limited to local regulations,

39  
40 17 clinical guidelines, terminology, drug names and drug doses), and is not responsible for any

41  
42 18 error and/or omissions arising from translation and adaptation or otherwise.  
43

44  
45 19

46  
47 20 **ORCID iD**

48  
49 21 Mehdi Mejdoubi ORCID iD 0000-0001-9422-9356  
50

51  
52 22  
53  
54  
55  
56  
57  
58  
59  
60

## 1 REFERENCES

- 1 1 Dong E, Du H, Gardner L. An interactive web-based dashboard to track COVID-19 in  
2 real time. *Lancet Infect Dis* 2020;20:533–4.
- 3 2 Salje H, Tran Kiem C, Lefrancq N, *et al.* Estimating the burden of SARS-CoV-2 in  
4 France. *Science* 2020;369:208–11. doi:10.1126/science.abc3517. Epub 2020 May 13.
- 5 3 Daily in-hospital deaths in France by counties. Available at:  
6 [https://geodes.santepubliquefrance.fr/#c=indicator&i=covid\\_hospit\\_incid.incid\\_dc&s=20-04-06&t=a01&view=map2](https://geodes.santepubliquefrance.fr/#c=indicator&i=covid_hospit_incid.incid_dc&s=20-04-06&t=a01&view=map2) [Accessed 10 June 2020]
- 7 4 INSEE. French population by county. Available at:  
8 <https://www.insee.fr/fr/statistiques/1893198> [Accessed 10 June 2020]
- 9 5 Legifrance. French counties classified by a weather index. Available at:  
10 [https://www.legifrance.gouv.fr/affichTexteArticle.do;jsessionid=C15D8E5264D6C645DD1664B5538085A0.tplgfr38s\\_2?idArticle=LEGIARTI000026910138&cidTexte=LEGITEXT000026910098&dateTexte=20200728](https://www.legifrance.gouv.fr/affichTexteArticle.do;jsessionid=C15D8E5264D6C645DD1664B5538085A0.tplgfr38s_2?idArticle=LEGIARTI000026910138&cidTexte=LEGITEXT000026910098&dateTexte=20200728) [Accessed 10 June 2020]
- 11 6 Cummings MJ, Baldwin MR, Abrams D, *et al.* Epidemiology, clinical course, and  
12 outcomes of critically ill adults with COVID-19 in New York City: a prospective cohort  
13 study. *Lancet* 2020 Jun 6;395(10239):1763-1770. doi: 10.1016/S0140-6736(20)31189-2.
- 14 7 Zhou F, Yu T, Du R, *et al.* Clinical course and risk factors for mortality of adult  
15 inpatients with COVID-19 in Wuhan, China: a retrospective cohort study. *Lancet*  
16 2020;395:1054–62. doi:10.1016/S0140-6736(20)30566-3.
- 17 8 Petrilli CM, Jones SA, Yang J, *et al.* Factors associated with hospital admission and  
18 critical illness among 5279 people with coronavirus disease 2019 in New York City:  
19 prospective cohort study. *BMJ* 2020;369:m1966. doi:10.1136/bmj.m1966.
- 20 9 Pareek M, Bangash MN, Pareek N, *et al.* Ethnicity and COVID-19: an urgent public  
21 health research priority. *Lancet* 2020;395:1421–2. doi:10.1016/S0140-6736(20)30922-3.

- 1  
2  
3 10 Ing AJ, Cocks C, Green JP. COVID-19: in the footsteps of Ernest Shackleton. *Thorax*  
4  
5 2020 Aug;75(8):693-694. doi: 10.1136/thoraxjnl-2020-215091.  
6  
7  
8 11 Mizumoto K, Kagaya K, Zarebski A, *et al.* Estimating the asymptomatic proportion of  
9  
10 coronavirus disease 2019 (COVID-19) cases on board the Diamond Princess cruise ship,  
11  
12 Yokohama, Japan, 2020. *Euro Surveill* 2020;25:2000180. doi:10.2807/1560-  
13  
14 7917.ES.2020.25.10.2000180.  
15  
16  
17 12 Liu J, Zhou J, Yao J, *et al.* Impact of meteorological factors on the COVID-19  
18  
19 transmission: a multi-city study in China. *Sci Total Environ* 2020;726:138513.  
20  
21 doi:10.1016/j.scitotenv.2020.138513.  
22  
23  
24 13 Russell TW, Wu JT, Clifford S, *et al*; Centre for the Mathematical Modelling of  
25  
26 Infectious Diseases COVID-19 Working Group. Effect of internationally imported cases  
27  
28 on internal spread of COVID-19: a mathematical modelling study. *Lancet Public Health*  
29  
30 2020 Dec 7:S2468-2667(20)30263-2. doi: 10.1016/S2468-2667(20)30263-2.  
31  
32  
33 14 Walker A, Houwaart T, Wienemann T, *et al.* Genetic structure of SARS-CoV-2 reflects  
34  
35 clonal superspreading and multiple independent introduction events, North-Rhine  
36  
37 Westphalia, Germany, February and March 2020. *Euro Surveill* 2020;25:2000746.  
38  
39 doi:10.2807/1560-7917.ES.2020.25.22.2000746.  
40  
41  
42 15 Shi P, Dong Y, Yan H, *et al.* Impact of temperature on the dynamics of the COVID-19  
43  
44 outbreak in China. *Sci Total Environ* 2020;728:138890.  
45  
46 doi:10.1016/j.scitotenv.2020.138890.  
47  
48  
49 16 Qi H, Xiao S, Shi R, *et al.* COVID-19 transmission in mainland China is associated with  
50  
51 temperature and humidity: a time-series analysis. *Sci Total Environ* 2020;728:138778.  
52  
53 doi:10.1016/j.scitotenv.2020.138778.  
54  
55  
56 17 Sajadi MM, Habibzadeh P, Vintzileos A, *et al.* Temperature, humidity, and latitude  
57  
58 analysis to estimate potential spread and seasonality of coronavirus disease 2019  
59  
60

- 1  
2  
3 1 (COVID-19). *JAMA Netw Open* 2020;3:e2011834.  
4  
5 2 doi:10.1001/jamanetworkopen.2020.11834.  
6  
7  
8 3 18 Mejdoubi M, Kyndt X, Djennaoui M. ICU admissions and in-hospital deaths linked to  
9  
10 4 COVID-19 in the Paris region are correlated with previously observed ambient  
11  
12 5 temperature. *PLoS One* 2020;15:e0242268. doi:10.1371/journal.pone.0242268.  
13  
14 6 19 Isaia G, Diémoz H, Maluta F, *et al.* Does solar ultraviolet radiation play a role in  
15  
16 7 COVID-19 infection and deaths? An environmental ecological study in Italy. *Sci Total*  
17  
18 8 *Environ* 2020;143757. doi:10.1016/j.scitotenv.2020.143757.  
19  
20 9 20 Zhang HJ, Su YY, Xu SL, *et al.* Asymptomatic and symptomatic SARS-CoV-2  
21  
22 10 infections in close contacts of COVID-19 patients: a seroepidemiological study. *Clin*  
23  
24 11 *Infect Dis* 2020 Jun 16:ciaa771. doi:10.1093/cid/ciaa771.  
25  
26 12 21 Prata DN, Rodrigues W, Bermejo PH. Temperature significantly changes COVID-19  
27  
28 13 transmission in (sub)tropical cities of Brazil. *Sci Total Environ* 2020;729:138862.  
29  
30 14 doi:10.1016/j.scitotenv.2020.138862.  
31  
32 15 22 Hallal PC, Hartwig FP, Horta BL, *et al.* SARS-CoV-2 antibody prevalence in Brazil:  
33  
34 16 results from two successive nationwide serological household surveys. *Lancet Glob*  
35  
36 17 *Health* 2020;8(11):e1390–8. doi:10.1016/S2214-109X(20)30387-9.  
37  
38 18 23 Zoran MA, Savastru RS, Savastru DM, *et al.* Assessing the relationship between surface  
39  
40 19 levels of PM2.5 and PM10 particulate matter impact on COVID-19 in Milan, Italy. *Sci*  
41  
42 20 *Total Environ* 2020;738:139825. doi:10.1016/j.scitotenv.2020.139825.  
43  
44 21 24 Jüni P, Rothenbühler M, Bobos P, *et al.* Impact of climate and public health interventions  
45  
46 22 on the COVID-19 pandemic: a prospective cohort study. *CMAJ* 2020;cmaj.200920.  
47  
48 23 doi:10.1503/cmaj.200920.  
49  
50  
51  
52  
53  
54  
55  
56  
57  
58  
59  
60

1  
2  
3 **1 Figure legends**  
4

5  
6  
7 **3 Figure 1** Main climate zones (H1a, H1b, H1c, H2, H3) of continental France counties  
8  
9 (“*départements*”).  
10

11  
12 **5 Figure 2** (A) Boxplots of in-hospital mortality rates according to the main climate zones. The  
13  
14 internal bold horizontal line is the median; the lower and upper box limits are the 1st and 3<sup>rd</sup>  
15  
16 quartile, respectively; and the T-bars represent range. (B) Multivariate linear-regression  
17  
18 analysis (95% confidence intervals (CI); with H2 serving as the reference). The analysis  
19  
20 retained climate zones (H1a, H1b) and population density as independent factors significantly  
21  
22 influencing in-hospital mortality.  
23  
24  
25  
26  
27  
28  
29  
30  
31  
32  
33  
34  
35  
36  
37  
38  
39  
40  
41  
42  
43  
44  
45  
46  
47  
48  
49  
50  
51  
52  
53  
54  
55  
56  
57  
58  
59  
60

1  
2  
3  
4  
5  
6  
7  
8  
9  
10  
11  
12  
13  
14  
15  
16  
17  
18  
19  
20  
21  
22  
23  
24  
25  
26  
27  
28  
29  
30  
31  
32  
33  
34  
35  
36  
37  
38  
39  
40  
41  
42  
43  
44  
45  
46  
47  
48  
49  
50  
51  
52  
53  
54  
55  
56  
57  
58  
59  
60

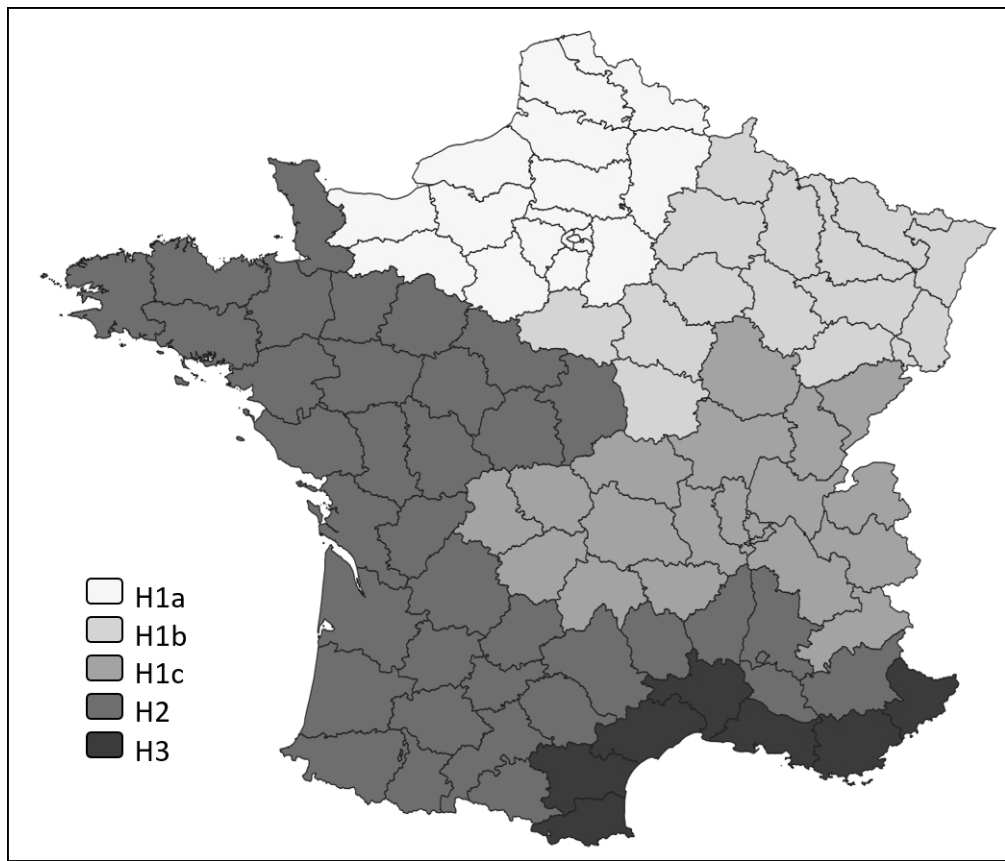

Figure 1. Main Climate Zones (H1a, H1b, H1c, H2, H3) of Continental France Administrative Areas ("Départements").

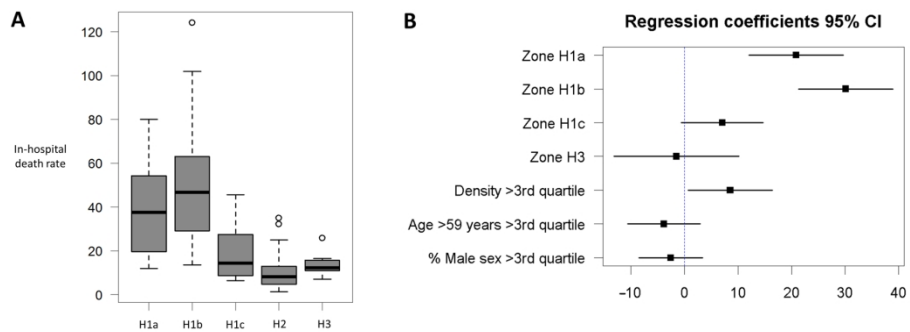

Figure 2. Boxplots of In-Hospital Mortality Rates According to the Main Climate Zones (A). The internal bold horizontal line is the median; the lower and upper box limits are the 1st and 3rd quartile, respectively; and the T-bars represent range. Multivariate linear-regression analysis (B) (95% confidence intervals CI; with H2 serving as the reference). The analysis retained climate zones (H1a, H1b) and population density as independent factors significantly influencing in-hospital mortality.



## Supplemental material

### Appendix 1 Multivariate multiple-linear regression analysis of initial data

| Factor (reference zone H2)                   | Regression coefficient [95% CI] | p value                |
|----------------------------------------------|---------------------------------|------------------------|
| Zone H1a                                     | 14.6 [3.8 to 25.4]              | 0.00962                |
| Zone H1b                                     | 37.2 [27.6 to 46.9]             | 4.39×10 <sup>-11</sup> |
| Zone H1c                                     | 6.0 [-2.7 to 14.9]              | 0.183                  |
| Zone H3                                      | 6.9 [-6.9 to 20.8]              | 0.329                  |
| Population density >3 <sup>rd</sup> quartile | 0.003 [0.001 to 0.004]          | 0.000229               |
| Age >59 y >3 <sup>rd</sup> quartile          | -0.97 [-1.7 to -0.1]            | 0.0208                 |
| Male sex, % >3 <sup>rd</sup> quartile        | 5.2 [-2.5 to 13.1]              | 0.187                  |

### Appendix 2 Multivariate multiple-linear regression analysis excluding outliers

| Factor (reference zone H2)                   | Regression coefficient [95% CI] | p value                |
|----------------------------------------------|---------------------------------|------------------------|
| Zone H1a                                     | 15.2 [6.6 to 23.8]              | 0.000785               |
| Zone H1b                                     | 30.4 [22.1 to 37.9]             | 7.65×10 <sup>-11</sup> |
| Zone H1c                                     | 6.8 [-0.1 to 13.8]              | 0.0574                 |
| Zone H3                                      | 3.4 [-7.5 to 14.4]              | 0.539                  |
| Population density >3 <sup>rd</sup> quartile | 0.004 [0.002 to 0.006]          | 0.00028                |
| Age >59 years >3 <sup>rd</sup> quartile      | -0.6 [-1.3 to -0.04]            | 0.0404                 |
| Male sex, % >3 <sup>rd</sup> quartile        | 0.6 [-5.6 to 6.9]               | 0.838                  |

STROBE Statement—Checklist of items that should be included in reports of *cross-sectional studies*

|                              | Item No | Recommendation                                                                                                                                                                                               | Page No      |
|------------------------------|---------|--------------------------------------------------------------------------------------------------------------------------------------------------------------------------------------------------------------|--------------|
| <b>Title and abstract</b>    | 1       | (a) Indicate the study's design with a commonly used term in the title or the abstract                                                                                                                       | 1            |
|                              |         | (b) Provide in the abstract an informative and balanced summary of what was done and what was found                                                                                                          | 2            |
| <b>Introduction</b>          |         |                                                                                                                                                                                                              |              |
| Background/rationale         | 2       | Explain the scientific background and rationale for the investigation being reported                                                                                                                         | 4            |
| Objectives                   | 3       | State specific objectives, including any prespecified hypotheses                                                                                                                                             | 4            |
| <b>Methods</b>               |         |                                                                                                                                                                                                              |              |
| Study design                 | 4       | Present key elements of study design early in the paper                                                                                                                                                      | 5            |
| Setting                      | 5       | Describe the setting, locations, and relevant dates, including periods of recruitment, exposure, follow-up, and data collection                                                                              | 5            |
| Participants                 | 6       | (a) Give the eligibility criteria, and the sources and methods of selection of participants                                                                                                                  | 5            |
| Variables                    | 7       | Clearly define all outcomes, exposures, predictors, potential confounders, and effect modifiers. Give diagnostic criteria, if applicable                                                                     | 5            |
| Data sources/<br>measurement | 8*      | For each variable of interest, give sources of data and details of methods of assessment (measurement). Describe comparability of assessment methods if there is more than one group                         | 5            |
| Bias                         | 9       | Describe any efforts to address potential sources of bias                                                                                                                                                    | 5            |
| Study size                   | 10      | Explain how the study size was arrived at                                                                                                                                                                    | 5            |
| Quantitative variables       | 11      | Explain how quantitative variables were handled in the analyses. If applicable, describe which groupings were chosen and why                                                                                 | 5            |
| Statistical methods          | 12      | (a) Describe all statistical methods, including those used to control for confounding                                                                                                                        | 6            |
|                              |         | (b) Describe any methods used to examine subgroups and interactions                                                                                                                                          | 6            |
|                              |         | (c) Explain how missing data were addressed                                                                                                                                                                  | NA           |
|                              |         | (d) If applicable, describe analytical methods taking account of sampling strategy                                                                                                                           |              |
|                              |         | (e) Describe any sensitivity analyses                                                                                                                                                                        | NA           |
| <b>Results</b>               |         |                                                                                                                                                                                                              |              |
| Participants                 | 13*     | (a) Report numbers of individuals at each stage of study—eg numbers potentially eligible, examined for eligibility, confirmed eligible, included in the study, completing follow-up, and analysed            | NA           |
|                              |         | (b) Give reasons for non-participation at each stage                                                                                                                                                         | NA           |
|                              |         | (c) Consider use of a flow diagram                                                                                                                                                                           | NA           |
| Descriptive data             | 14*     | (a) Give characteristics of study participants (eg demographic, clinical, social) and information on exposures and potential confounders                                                                     | 6            |
|                              |         | (b) Indicate number of participants with missing data for each variable of interest                                                                                                                          | NA           |
| Outcome data                 | 15*     | Report numbers of outcome events or summary measures                                                                                                                                                         | 6            |
| Main results                 | 16      | (a) Give unadjusted estimates and, if applicable, confounder-adjusted estimates and their precision (eg, 95% confidence interval). Make clear which confounders were adjusted for and why they were included | 6, 7, 16, 17 |

|                          |    |                                                                                                                                                                            |    |
|--------------------------|----|----------------------------------------------------------------------------------------------------------------------------------------------------------------------------|----|
|                          |    | (b) Report category boundaries when continuous variables were categorized                                                                                                  | NA |
|                          |    | (c) If relevant, consider translating estimates of relative risk into absolute risk for a meaningful time period                                                           | NA |
| Other analyses           | 17 | Report other analyses done—eg analyses of subgroups and interactions, and sensitivity analyses                                                                             | NA |
| <b>Discussion</b>        |    |                                                                                                                                                                            |    |
| Key results              | 18 | Summarise key results with reference to study objectives                                                                                                                   | 7  |
| Limitations              | 19 | Discuss limitations of the study, taking into account sources of potential bias or imprecision. Discuss both direction and magnitude of any potential bias                 | 12 |
| Interpretation           | 20 | Give a cautious overall interpretation of results considering objectives, limitations, multiplicity of analyses, results from similar studies, and other relevant evidence | 9  |
| Generalisability         | 21 | Discuss the generalisability (external validity) of the study results                                                                                                      | 11 |
| <b>Other information</b> |    |                                                                                                                                                                            |    |
| Funding                  | 22 | Give the source of funding and the role of the funders for the present study and, if applicable, for the original study on which the present article is based              | 1  |

\*Give information separately for exposed and unexposed groups.

**Note:** An Explanation and Elaboration article discusses each checklist item and gives methodological background and published examples of transparent reporting. The STROBE checklist is best used in conjunction with this article (freely available on the Web sites of PLoS Medicine at <http://www.plosmedicine.org/>, Annals of Internal Medicine at <http://www.annals.org/>, and Epidemiology at <http://www.epidem.com/>). Information on the STROBE Initiative is available at [www.strobe-statement.org](http://www.strobe-statement.org).

# BMJ Open

## Link between COVID-19–related in-hospital mortality in continental France administrative areas and weather: an ecological study

|                                 |                                                                                                                                                                                                                                                                                                                                                                                            |
|---------------------------------|--------------------------------------------------------------------------------------------------------------------------------------------------------------------------------------------------------------------------------------------------------------------------------------------------------------------------------------------------------------------------------------------|
| Journal:                        | <i>BMJ Open</i>                                                                                                                                                                                                                                                                                                                                                                            |
| Manuscript ID                   | bmjopen-2020-043269.R2                                                                                                                                                                                                                                                                                                                                                                     |
| Article Type:                   | Original research                                                                                                                                                                                                                                                                                                                                                                          |
| Date Submitted by the Author:   | 15-Feb-2021                                                                                                                                                                                                                                                                                                                                                                                |
| Complete List of Authors:       | mejdoubi, mehdi; Centre Hospitalier de Valenciennes, Department of Radiology, Hospital of Valenciennes, Valenciennes, France.<br>djennaoui, mehdi; Hospital Centre Valenciennes, Department of Public Health, Hospital of Valenciennes, Valenciennes, France.<br>kyndt, xavier; Hospital Centre Valenciennes, Department of Public Health, Hospital of Valenciennes, Valenciennes, France. |
| <b>Primary Subject Heading</b>: | Epidemiology                                                                                                                                                                                                                                                                                                                                                                               |
| Secondary Subject Heading:      | Public health, Infectious diseases                                                                                                                                                                                                                                                                                                                                                         |
| Keywords:                       | COVID-19, Epidemiology < INFECTIOUS DISEASES, INFECTIOUS DISEASES                                                                                                                                                                                                                                                                                                                          |
|                                 |                                                                                                                                                                                                                                                                                                                                                                                            |

SCHOLARONE™  
Manuscripts

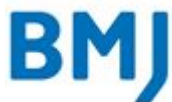

I, the Submitting Author has the right to grant and does grant on behalf of all authors of the Work (as defined in the below author licence), an exclusive licence and/or a non-exclusive licence for contributions from authors who are: i) UK Crown employees; ii) where BMJ has agreed a CC-BY licence shall apply, and/or iii) in accordance with the terms applicable for US Federal Government officers or employees acting as part of their official duties; on a worldwide, perpetual, irrevocable, royalty-free basis to BMJ Publishing Group Ltd ("BMJ") its licensees and where the relevant Journal is co-owned by BMJ to the co-owners of the Journal, to publish the Work in this journal and any other BMJ products and to exploit all rights, as set out in our [licence](#).

The Submitting Author accepts and understands that any supply made under these terms is made by BMJ to the Submitting Author unless you are acting as an employee on behalf of your employer or a postgraduate student of an affiliated institution which is paying any applicable article publishing charge ("APC") for Open Access articles. Where the Submitting Author wishes to make the Work available on an Open Access basis (and intends to pay the relevant APC), the terms of reuse of such Open Access shall be governed by a Creative Commons licence – details of these licences and which [Creative Commons](#) licence will apply to this Work are set out in our licence referred to above.

Other than as permitted in any relevant BMJ Author's Self Archiving Policies, I confirm this Work has not been accepted for publication elsewhere, is not being considered for publication elsewhere and does not duplicate material already published. I confirm all authors consent to publication of this Work and authorise the granting of this licence.

1  
2  
3 **1 Link between COVID-19–related in-hospital mortality in continental France**  
4  
5 **2 administrative areas and weather: an ecological study**  
6

7  
8 **3 Mehdi Mejdoubi iD,<sup>1</sup> Mehdi Djennaoui,<sup>2</sup> Xavier Kyndt<sup>2</sup>**  
9

10  
11  
12 **5 <sup>1</sup>Department of Radiology, Hospital of Valenciennes, Valenciennes, France.**

13  
14 **6 <sup>2</sup>Department of Public Health, Hospital of Valenciennes, Valenciennes, France.**  
15  
16

17  
18  
19 **8 Correspondence to**

20  
21 **9 Prof Mehdi Mejdoubi, Department of Radiology, Hospital of Valenciennes, CS 50479, 59322**  
22  
23 **10 Valenciennes Cedex, France. Tel: +33 3 27 14 50 24; Fax: +33 3 37 14 35 80; Email:**  
24  
25 **11 mejdoubi-m@ch-valenciennes.fr**  
26  
27  
28  
29

30  
31 **13 Keywords:** COVID-19, outbreak, pandemic, risk factors, weather  
32  
33  
34

35  
36 **15 Word count:** 2504  
37  
38  
39  
40  
41  
42  
43  
44  
45  
46  
47  
48  
49  
50  
51  
52  
53  
54  
55  
56  
57  
58  
59  
60

1  
2  
3 **1 ABSTRACT**  
4

5 **2 Objective** To assess the effect of a weather index on in-hospital COVID-19–linked deaths.  
6

7 **3 Design** Ecological study.  
8

9  
10 **4 Setting** Continental France administrative areas (*départements*; henceforth counties). The  
11  
12 study period, from 18 March to 30 May 2020, corresponds to the main first outbreak period in  
13  
14 France.  
15

16  
17 **7 Population** COVID-19–linked in-hospital deaths.  
18

19 **8 Main outcome measures** In-hospital deaths and demographics (population, human density,  
20  
21 male sex and population percentage >59 years old) were obtained from national and  
22  
23 centralised public databases. County weather indexes were calculated by the French National  
24  
25 Meteorological Agency.  
26  
27

28 **12 Methods** In this observational, ecological study, the relationship between in-hospital COVID-  
29  
30 19–related mortality and climate zones in continental French counties were analysed, by  
31  
32 comparing the cumulative in-hospital death tolls in France by county to other factors  
33  
34 (population density, climate, age and sex). The study period lasted from 18 March to 30 May  
35  
36 2020. A multivariate linear-regression analysis of in-hospital mortality included climate  
37  
38 zones, population density, population >59 years old and percentages of males as potential  
39  
40 predictors. The significance level was set at 5%.  
41  
42  
43

44 **19 Results** Weather indicators and population density were factors independently associated with  
45  
46 the COVID-19 death toll. Colder counties had significantly higher mortality rates  
47  
48 ( $p<0.00001$ ). Percentages of males and population >59 years old in counties did not affect  
49  
50 COVID-19 in-hospital mortality.  
51  
52

53 **23 Conclusions** Many parameters influence COVID-19 outbreak-severity indicators. Population  
54  
55 density is a strong factor but its exact importance is difficult to discern. Weather (mainly cold  
56  
57 winter temperatures) was independently associated with mortality and could help explain  
58  
59  
60

1 outbreak dynamics, which began and were initially more severe in the coldest counties of  
2 continental France. Weather partly explains fatality-rate discrepancies observed worldwide.

#### 4 **Strengths and limitations of this study**

- 5 • This ecological study is based on a country with data reliability, different climate  
6 zones and homogeneous social conduct during the study period.
- 7 • French continental administrative areas include coastal, non-coastal and other counties  
8 with cold winters.
- 9 • Generalisability of our results is mainly valid for temperate climates.
- 10 • Due to the ecological design of the study, we were unable to control for co-morbidities in  
11 the multivariate analysis.

## 15 **INTRODUCTION**

16 The world is experiencing a major novel coronavirus disease-2019 (COVID-19) pandemic  
17 since December 2019, with >1 570 000 deaths (as of 10 December 2020).[1] In France, the  
18 outbreak began in early March 2020 in the Alsace “*Département*” (an administrative area  
19 comparable to a county in the US and UK; henceforth county), quickly spread throughout  
20 continental France, with the major hotspot being Paris and its suburbs.[2] The national  
21 lockdown, started 17 March 2020, achieved flattening of the infection-outbreak curve (with  
22 the mortality peak reached on 6 April) and was eased on 11 May 2020.[2] Deaths exceeded  
23 30 000 during the first wave and, although the outbreak seemed to be under control during the  
24 summer, a second wave started in October 2020.

25 Severe acute respiratory syndrome coronavirus-2 (SARS-CoV-2) transmission causes



1  
2  
3 1 COVID-19. All epidemics are the result of multiple factors, like population density, human  
4  
5 2 displacements and individual human susceptibility (age, co-morbidities, etc.). The question  
6  
7 3 remains whether meteorological parameters are an independent factor of disease transmission  
8  
9 4 and/or severity. Epidemiological studies are often biased by the imprecise results of large-  
10  
11 5 scale biological testing, which has only recently been fully implemented in France. In-hospital  
12  
13 6 deaths are a more reliable data source, even though it encompasses different types of patients  
14  
15 7 (some intensively treated, other just receiving palliative care).

16  
17  
18  
19 8 This study was undertaken to explore the relationship between COVID-19-linked in-  
20  
21 9 hospital deaths, at the county level, and weather indicators.  
22  
23  
24 10

## 25 26 11 **METHODS**

### 27 28 12 **Population**

29  
30  
31 13 In this observational, ecological study, the relationship between in-hospital, COVID-19-  
32  
33 14 linked mortality and climate zones in 94 continental French counties areas was analysed. The  
34  
35 15 overseas territories and Corsica were excluded from the analysis because of their particular  
36  
37 16 localisations (with tropical or subtropical climate for some) and special insular conditions (for  
38  
39 17 some). The study period lasted from 18 March to 30 May 2020.  
40  
41  
42 18

### 43 44 19 **Data**

45  
46  
47 20 We compared the cumulative in-hospital death tolls in continental France (64 million  
48  
49 21 inhabitants) by county to other factors (population density, climate, age and sex). The 18 314  
50  
51 22 deaths in France during the observation period classified by county were obtained from the  
52  
53 23 French open-source database (*Santé Publique France*).[3] On 31 May and throughout June  
54  
55 24 2020, respectively, 35 and 888 additional in-hospital deaths were not considered for the study.  
56  
57  
58 25 In France, access to healthcare is free and during this outbreak, there was no shortage of  
59  
60

1 available conventional or ICU hospital beds. In-hospital deaths in France are assigned to the  
2 areas where the deceased persons lived.

3 The following demographic characteristics for each county were obtained from the  
4 French Institute for Statistics and Epidemiology (INSEE)[4]: total population, percentage of  
5 the population >59 years (INSEE categorises oldest populations in only two classes: 60–74  
6 and ≥75 years old), percentage of males in the population and human density per km<sup>2</sup>.

7 To assess the climate conditions, the French counties were classified according to a  
8 French Climate Severity Index (*Indice de Rigueur Climatique*).[5] That Index is calculated  
9 (from local measurements in each zone) by the French National Meteorological Agency.

10 Three main climate patterns (H1, H2, H3; figure 1) are defined according to winter  
11 temperatures, with H1 representing the coldest zone and H3 the warmest. Regional H2 zones  
12 are known to be homogeneous, which contrasts with H1 zones, sub-characterised according to  
13 summer temperatures and coastal influence into H1a, H1b, H1c (with H1b being colder in  
14 winter and hotter in summer than H1a). These zones are ranked according to winter  
15 temperatures from coldest to warmest: H1b>H1a>H1c>H2>H3. The data used were collected  
16 historically and are not from winter 2020.

## 18 **Patient and public involvement**

19 No patients were directly involved in this study.

## 21 **Statistical Analyses**

22 All database variables were tested. Bivariate analyses were computed between in-hospital  
23 COVID-19-related mortality, and each weather indicator and each demographic parameter  
24 (density, age, sex). For comparisons, the Kruskal–Wallis test and Pearson’s correlation test  
25 were used, as appropriate. The significance level was set at 5%. Those bivariate analyses were

1 also completed by multivariate linear-regression analysis (first multivariate model). The  
 2 statistical quality of the model was assessed with the variance–covariance matrix of residuals  
 3 and normality for their distribution. Data were analysed by Cook’s distance, which showed  
 4 three counties with outliers: Paris (which received patients from its suburbs because, as the  
 5 nation’s capital, it has a disproportionately higher hospital density), Haut-Rhin and Belfort  
 6 (eastern France, where the outbreak began). Therefore, a second multivariate model excluding  
 7 outliers was built, which had a more homogeneous distribution of residuals. The multivariate  
 8 analysis was finalised by a multiple linear-regression model excluding outliers, with  
 9 categorisation of quantitative data into binary variables using the third quartile as the  
 10 threshold value (third model). The statistical analyses were computed with R software version  
 11 4.0.0.

## 13 RESULTS

14 Demographic and hospital data characteristics during the study period are reported **table 1**.

16 **Table 1** French county demographic and COVID-19–linked mortality data

| Parameter                                         | Mean      | SD        | 95% CI                | Median (1 <sup>st</sup> –3 <sup>rd</sup> quartile) |
|---------------------------------------------------|-----------|-----------|-----------------------|----------------------------------------------------|
| Population                                        | 686 736.9 | 520 296.7 | [580 169.8–793 304.0] | 543 636.5 (306 500.5–887 016.7)                    |
| In-hospital deaths                                | 194.8     | 288.1     | [135.8–253.8]         | 80.5 (34.5–191)                                    |
| In-hospital death rate*                           | 24.1      | 23.2      | [19.4–28.9]           | 14.1 (8.6–33.8)                                    |
| Population density (inhabitants/km <sup>2</sup> ) | 575.8     | 2471.9    | [69.5–1082.1]         | 85.4 (51.6–165.9)                                  |
| Age >59 years (%)                                 | 29.5      | 4.8       | [28.5–30.5]           | 29.4 (26.4–33.2)                                   |
| Male sex (%)                                      | 48.4      | 0.5       | [48.3–48.5]           | 48.5 (48.1–48.8)                                   |

17 \*Number per 100 000 inhabitants.

18 SD, standard deviation; CI, confidence interval

20 Bivariate analysis demonstrated a significant link between in-hospital COVID-19-related

1 mortality and climate zone (figure 2A). Mean (standard deviation) mortality rates for climate  
 2 zones H1a (table 2), H1b, H1c, H2 and H3 differed significantly ( $p=8.84\times 10^{-10}$ ).

4 **Table 2** French demographic and COVID-19–linked mortality data according to climate zone

| Climate zone | Counties, No. (%) | Population, mean | Population, density mean* | Age >59 y mean (%) | Male sex, mean (%) | In-hospital deaths, mean | In-hospital death rate†, mean (SD) |
|--------------|-------------------|------------------|---------------------------|--------------------|--------------------|--------------------------|------------------------------------|
| H1a          | 18 (19)           | 1 193 507.1      | 2583.9                    | 24.1               | 48.4               | 517.3                    | 39.2 (21.8)                        |
| H1b          | 15 (16)           | 473 311.2        | 100.8                     | 29.4               | 48.7               | 258.3                    | 51.2 (31.4)                        |
| H1c          | 18 (19)           | 551 782.5        | 105.1                     | 30.1               | 48.5               | 120.5                    | 18.3 (11.8)                        |
| H2           | 36 (38)           | 529 843.7        | 80.4                      | 31.6               | 48.4               | 50.6                     | 10.2 (8.2)                         |
| H3           | 7 (7)             | 994 859.8        | 187.6                     | 31.0               | 47.7               | 161.7                    | 14.0 (6.0)                         |

5 \*Inhabitants/land area.

6 †Number per 100 000 inhabitants.

7 SD, standard deviation.

9 Bivariate analysis (correlation coefficients) also found significant independent statistical links  
 10 between COVID-19-related mortality and population density or age >59 years but not male  
 11 sex (table 3).

13 **Table 3** Bivariate and multivariate analyses of in-hospital death rates\*

| Factor                    | In-hospital mortality rate† |              | Correlation |                       |
|---------------------------|-----------------------------|--------------|-------------|-----------------------|
|                           | Mean (SD)                   | Median (IQR) | coefficient | p value               |
| <b>Bivariate Analysis</b> |                             |              |             |                       |
| Zone H1a‡                 | 39.2 (21.8)                 | 37.6 (32.9–) | –           | $8.84\times 10^{-10}$ |
| Zone H1b‡                 | 51.2 (31.4)                 | 46.6 (34.0–) | –           |                       |
| Zone H1c‡                 | 18.3 (11.8)                 | 14.3 (17.2–) | –           |                       |
| Zone H2‡                  | 10.2 (8.2)                  | 8.1 (7.9–)   | –           |                       |
| Zone H3‡                  | 14.0 (6.0)                  | 12.2 (4.7–)  | –           |                       |

|                                              |                             |   |                      |                       |
|----------------------------------------------|-----------------------------|---|----------------------|-----------------------|
| Population density§                          | –                           | – | 0.39                 | $9.42 \times 10^{-5}$ |
| Age >59 years, %§                            | –                           | – | –0.45                | $5.36 \times 10^{-6}$ |
| <b>Multivariate Analysis</b>                 | <b>Regression</b>           |   |                      |                       |
| (reference zone H2)                          | <b>coefficient [95% CI]</b> |   |                      |                       |
| Zone H1a                                     |                             |   | 20.8 [12.0 to 29.6]  | $1.21 \times 10^{-5}$ |
| Zone H1b                                     |                             |   | 30.1 [21.3 to 38.9]  | $2.41 \times 10^{-9}$ |
| Zone H1c                                     |                             |   | 7.0 [–0.5 to 14.7]   | 0.074                 |
| Zone H3                                      |                             |   | –1.4 [–13.1 to 10.1] | 0.803                 |
| Population density >3 <sup>rd</sup> quartile |                             |   | 8.5 [0.6 to 16.4]    | 0.0361                |
| Age >59 years >3 <sup>rd</sup> quartile      |                             |   | –3.8 [–10.6 to 2.9]  | 0.272                 |
| Male sex, % >3 <sup>rd</sup> quartile        |                             |   | –2.5 [–8.4 to 3.3]   | 0.399                 |

1 \*Multiple-linear regression excluding outliers with categorised quantitative data.

2 †Number per 100 000 inhabitants.

3 ‡Kruskal–Wallis test.

4 §Pearson's correlation test.

5 SD, standard deviation; IQR, interquartile range, 1<sup>st</sup>–3<sup>rd</sup> quartile.

7 According to multivariate analysis of the initial data (using zone H2 as the reference),  
 8 COVID-19-linked mortality was associated with the following parameters: climate zones H1a  
 9 (regression coefficient 14.6,  $p=0.00962$ ) and H1b (regression coefficient 37.2,  $p=4.39 \times 10^{-11}$ ),  
 10 population density (regression coefficient 0.003,  $p=0.000229$ ) and age (regression coefficient  
 11  $-0.97$ ,  $p=0.0208$ ) (supplemental appendix 1). Results of the multiple linear-regression model  
 12 excluding outliers (Cook's distance  $>0.1$ ) were similar, with statistically significant effects for  
 13 climate zones H1a (regression coefficient 15.2,  $p=0.000785$ ) and H1b (regression coefficient  
 14  $30.4$ ,  $p=7.65 \times 10^{-11}$ ), population density (regression coefficient 0.004,  $p=0.00028$ ) and age  
 15 (regression coefficient  $-0.6$ ,  $p=0.0404$ ) (supplemental appendix 2). Residual analyses for the  
 16 multivariate models using the initial data was less conclusive than that excluding outliers.  
 17 After categorisation of quantitative data into binary variables, results remained similar with

1 statistically significant effects of climate zones H1a and H1b and population density (table 3)  
2 (Figure 2B). The only difference between the third model and the second model was the non-  
3 significance of the age. H3 climate zone and male sex were not significant in any of the three  
4 models constructed.

## 6 DISCUSSION

7 Our results showed that COVID-19–related in-hospital mortality—throughout continental  
8 France—was due to at least two independent factors: weather index and population density.  
9 We did not find a difference among counties for the percent population aged >59 years or  
10 male sex. As for any outbreak, the COVID-19 pandemic has multifactorial origins. Some are  
11 already well-documented: individual factors (age, male sex, co-morbidities), high population  
12 density and all types of human displacements. Many others are still being discussed (weather  
13 indicators, socio-economic factors, immune status).

14 Individual risk factors for COVID-19 severity were identified relatively quickly, as this  
15 pathology often requires hospitalisation (with or without ventilation), and it first emerged in  
16 developed countries, after Wuhan, China. The main severity factors reported are: age >50  
17 years, co-morbidities, male sex.[6-8] Co-morbidities are independent factors with a  
18 multivariable odds ratio (OR) ranging from 1.31 (diabetes) to 2.94 (pulmonary disease).[6]  
19 Age is a major independent factor, with a reported multivariable OR of 1.10 per 1-year  
20 increment[7] or 1.31 per 10-year increment[6] and male sex has an OR of 1.13. We attribute  
21 our inability to find an age effect among French counties to: first, only in-hospital deaths were  
22 available according to county and, second, the oldest patients were not systematically  
23 hospitalised (while in-assisted-residence deaths accounted for one-third of the death toll in  
24 France). Therefore, the among-county differences for those >59-year-old–class deaths were  
25 not retrieved from the in-hospital death data. Nevertheless, despite the significantly higher

1  
2  
3 1 proportion of >59-year-olds in H1c, H2 and H3 climate zones (table 2), in-hospital mortality  
4  
5 2 was significantly higher in H1a zones.  
6

7  
8 3 We did not find male sex to be discriminant among French counties, because they had a  
9  
10 4 mean 48.4% of males with a small standard deviation of 0.5. Ethnicity[9] and socio-economic  
11  
12 5 status have also been evoked as etiological factors but their independence remains to be  
13  
14 6 proven.  
15

16  
17 7 For most epidemics, especially of respiratory diseases, population density is a major  
18  
19 8 cause of transmission. Cities are more affected than rural areas and, within cities,  
20  
21 9 neighbourhoods with dense housing are, unsurprisingly, more affected. The highest death tolls  
22  
23 10 were in big cities (New York, Paris, Madrid, London) and within them, poor neighbourhoods  
24  
25 11 were more severely affected for highly interwoven reasons. However, the ‘number of  
26  
27 12 people/land area’ is a poor indicator of the human-population–density characteristic, as it is  
28  
29 13 embedded in a wide variety of situations (housing mode, transportation mode, inner-city  
30  
31 14 density, human interactions, cultural and behavioural habits). Indeed, many outbreaks  
32  
33 15 occurred on (cruise or military) ships,[10] likely due to the same combined effect of closed  
34  
35 16 environment and prolonged contact. Thus, the Diamond Princess cruise was classified among  
36  
37 17 the most affected ‘entities’ at the beginning of the pandemic in March 2020.[11] That said,  
38  
39 18 cruise ships are the perfect laboratory model of outbreak spread in small cities.  
40  
41  
42  
43

44 19 Our results showed human density to be an independent factor for COVID-19–related  
45  
46 20 deaths but we acknowledge that its exact importance cannot be determined, as we are limited  
47  
48 21 by the wide range of situations that human density encompasses, with many factors that  
49  
50 22 should be taken into account. Our assessment of human density (and interactions) was mainly  
51  
52 23 made during a lockdown; therefore, the importance of this factor is likely underestimated  
53  
54 24 herein. Also, population density does not have the same connotation and consequences in  
55  
56 25 poor and rich countries. The outbreak extension to hot climates indicates that human  
57  
58  
59  
60

1 interactions are likely even more important for virus spread than weather (unlike our results).

2       The cities gather not only locals but also draws infected people, with airport arrivals  
3 representing the fastest entry point of the outbreak. Since the 1968–69 flu pandemic, we have  
4 known that international travel and plane transportation is a major vector of virus  
5 displacement. According to Liu *et al*,[12] COVID-19 has spread in multiple major cities in  
6 China that have large numbers of inbound and outbound passengers. They used an internet-  
7 based (“Baidu”) Migration Scale Index for 30 cities and found an association with confirmed  
8 cases. Pertinently, population migration and displacement or movement-control measures  
9 implemented (quarantine, limited migration/limited travel/travel bans, closed borders)  
10 reduced virus spread everywhere. In 2019, the top five countries receiving international  
11 tourists were France, Spain, Italy, China and the USA. Those countries were the main ones  
12 affected by the pandemic during March and April 2020. This human-migration dynamic  
13 partly explains the epidemic’s temporality worldwide.[13]

14       Some human behaviours (hand-shaking, cheek-kissing, body contact, crowds),  
15 intrinsically responsible for social-distancing differences, are also likely to influence SARS-  
16 Cov-2 transmission. But, within a small- or medium-sized country (as in France), they may be  
17 relatively homogeneous. It is difficult to individualise these cultural factors, and no clear and  
18 unbiased study indicators have been identified, but they likely account for mortality  
19 discrepancies among countries. For example, massive virus spreading was reported after  
20 carnivals in different settings (New Orleans, Louisiana, and Gangelt, Germany[14]).

21       Viral epidemics, such flu and gastroenteritis, are known to follow seasonal cycles with  
22 resurgences during autumn and winter, favoured by cold temperatures. Previous coronavirus  
23 outbreaks (SARS-CoV-1 and Middle East Respiratory Syndrome) were also linked to  
24 weather[12] (mainly temperature). A climate effect on the wide dissemination of a respiratory  
25 disease is a highly intuitive conclusion and SARS-CoV-2 is transmitted mainly through



1  
2  
3 1 droplets and aerosols. Temperature, humidity and wind were found to impact the spread of  
4  
5 2 this outbreak,[12, 15-19] based on confirmed infections. Notably, biological testing is known  
6  
7 3 to monitor imprecisely this outbreak because 23%–40% of the cases are asymptomatic.[20]  
8  
9 4 Moreover, false-negative reverse transcriptase-polymerase chain reaction results may occur.  
10  
11 5 Therefore, our study focused on more precise, in-hospital deaths, collected in a centralised  
12  
13 6 electronic database.

14  
15  
16  
17 7 In many countries spanning multiple latitudes, clear north–south gradients[18, 19] were  
18  
19 8 observed with more deaths further north: France, Spain, Italy, USA (as of 10 December 2020,  
20  
21 9 New York State had more deaths (35 183) than Florida (19 462),[1] despite Florida having a  
22  
23 10 larger population and the highest percentage population in the US >65 years old). Notably,  
24  
25 11 Rome, the largest Italian city with a Mediterranean climate, was proportionally less affected  
26  
27 12 than northern cities,[19] which have a different climate.

28  
29  
30 13 Based on our results for continental France, southern and coastal areas seem to be more  
31  
32 14 protected than colder inland areas. Notably, our findings were confirmed by observations  
33  
34 15 made in Spain, where the Madrid region was hit harder than coastal and southern zones.  
35  
36 16 Western Europe (France, UK, Belgium, Netherlands and Germany) has a mainly oceanic  
37  
38 17 climate and the outbreak followed the same course (sudden rise in March, decline in May and  
39  
40 18 resumption in October 2020),[1] despite their different public health-policy approaches. Also,  
41  
42 19 few large cities in East and Southeast Asia (except Wuhan) were COVID-19 pandemic  
43  
44 20 hotspots, despite human-population density being among the highest in the world. That  
45  
46 21 observation can be explained by: (1) aggressive management of the epidemic in cold areas  
47  
48 22 (South Korea, Japan, and China, which implemented the strictest lockdown in the world); (2)  
49  
50 23 other protective behaviours, including traditional cultural distancing; (3) some protective  
51  
52 24 climate effect in warm areas (Hong Kong, Singapore, Taiwan). Of course, the combination of  
53  
54 25 these three factors would achieve the highest protection.  
55  
56  
57  
58  
59  
60

1 Pertinently, the climate's protective effect alone would not spare a population from the  
2 outbreak and, indeed, almost all countries on earth have been impacted. Moreover, the  
3 protection afforded by higher temperatures remains to be precisely defined depending on the  
4 climate, because the interactions among temperature, humidity, wind and sunlight are  
5 complex. Still, Prata *et al*[21] showed that, in Brazil, the climate's effect may exist, even in  
6 tropical regions, where the range of temperatures is limited. Inversely, the results of Hallal *et*  
7 *al*'s [22] nationwide antibody-prevalence survey in Brazil showed that the most affected areas  
8 were located along the Amazon river, which has the warmest climate. They explained those  
9 findings by human density on boats, the major means of transporting people, and excess  
10 multifactorial risks among indigenous populations.

11 Air pollution also was shown to be associated with virus spread in northern Italy,[23] but  
12 because pollution is closely related to weather conditions, its independent role remains to be  
13 specified.

14 Public health strategies have been extensively implemented worldwide.[24] It is likely  
15 that climate alone is not sufficient to extinguish this outbreak, and public health interventions,  
16 aimed at containing and reducing virus circulation, will be needed on a long-term basis.  
17 Weather factors and human social behaviours (partly linked to meteorological conditions)  
18 seem to contribute to COVID-19 epidemiological dynamics. This multifactorial character  
19 could explain why, despite some climate protection, some warm areas in Central and South  
20 America are experiencing massive epidemics. Notably, their national strategies implemented  
21 only partial social distancing and, even now, persist in opposing it (Brazil,[22] Mexico). Liu  
22 *et al*[12] concluded rightly for China: "this epidemic will be faded to a large degree in the  
23 coming warmer season with the enforcement of public health interventions in China," which  
24 emphasises the absolute need for social distancing and not to rely solely on a weather effect.

25

## 1 **Strengths and Limitations**

2 Few countries have simultaneous hospital-data reliability, different climate zones,  
3 homogeneous social behaviour during the outbreak (including a uniformly implemented  
4 lockdown) and high COVID-19-related mortality. France met all those conditions. However,  
5 our study has some limitations. First, the death-toll breakdown per county is available only for  
6 in-hospital deaths. Second, the impact of each etiological factor may vary among different  
7 countries and climates, therefore, generalisability of our results is mainly valid for temperate  
8 countries in the northern hemisphere. Third, the France weather index we used provided a  
9 historic collection of weather data, but not winter 2019–2020 conditions. Finally, co-  
10 morbidities could not be analysed because of the ecological design of the study but we think  
11 that their distribution is relatively homogeneous among French counties.

## 13 **Conclusion**

14 Our findings suggest that climate is an independent factor influencing COVID-19-linked  
15 mortality at the county level in continental France. Human-population density (and therefore  
16 social interactions) is an independent factor, whose impact has been widely proven. These  
17 factors, along with others (age pyramid, cultural factors, co-morbidities), explain the course of  
18 this pandemic throughout the world. The fatality discrepancies among countries and among  
19 administrative subdivisions within countries likely follow the same rules worldwide. Our  
20 findings also imply that this COVID-19 outbreak will last throughout the coldest periods, but  
21 seasonality is complex, as it involves more than climate alone (eg, immune status, virus  
22 mutation).

24 **Acknowledgements** none

25 **Contributors:** MM: conceptualisation, methodology, data curation, writing original draft.

1  
2  
3 1 XK: methodology, writing, manuscript editing. MD: methodology, software, data curation,  
4  
5 2 writing, manuscript editing. All authors have read and approved the submission.  
6

7  
8 3 **Funding:** There was no funding source for this study.  
9

10 4 **Competing interests:** The authors report no potential conflicts of interest.  
11

12 5 **Patient and public involvement:** Patients and/or the public were not involved in  
13  
14 6 the design, or conduct, or reporting, or dissemination plans of this research.  
15

16 7 **Data availability statement:** Weather data and epidemiological data are all available free-of-  
17  
18 8 charge from public databases.  
19

20 9 - Daily in-hospital deaths in France by counties. Available at:  
21

22  
23 10 [https://geodes.santepubliquefrance.fr/#c=indicator&i=covid\\_hospit\\_incid.incid\\_dc&s=2020-](https://geodes.santepubliquefrance.fr/#c=indicator&i=covid_hospit_incid.incid_dc&s=2020-04-06&t=a01&view=map2)  
24  
25 11 [04-06&t=a01&view=map2](https://geodes.santepubliquefrance.fr/#c=indicator&i=covid_hospit_incid.incid_dc&s=2020-04-06&t=a01&view=map2)  
26  
27

28 12 - French population by county. Available at: <https://www.insee.fr/fr/statistiques/1893198>  
29

30 13 - French counties classified by a weather index. Available at:  
31

32  
33 14 [https://www.legifrance.gouv.fr/affichTexteArticle.do;jsessionid=C15D8E5264D6C645DD16](https://www.legifrance.gouv.fr/affichTexteArticle.do;jsessionid=C15D8E5264D6C645DD1664B5538085A0.tplgfr38s_2?idArticle=LEGIARTI000026910138&cidTexte=LEGITEXT000026910098&dateTexte=20200728)  
34  
35 15 [64B5538085A0.tplgfr38s\\_2?idArticle=LEGIARTI000026910138&cidTexte=LEGITEXT000](https://www.legifrance.gouv.fr/affichTexteArticle.do;jsessionid=C15D8E5264D6C645DD1664B5538085A0.tplgfr38s_2?idArticle=LEGIARTI000026910138&cidTexte=LEGITEXT000026910098&dateTexte=20200728)  
36  
37 16 [026910098&dateTexte=20200728](https://www.legifrance.gouv.fr/affichTexteArticle.do;jsessionid=C15D8E5264D6C645DD1664B5538085A0.tplgfr38s_2?idArticle=LEGIARTI000026910138&cidTexte=LEGITEXT000026910098&dateTexte=20200728)  
38  
39

40 17 **Supplemental material** This material has been supplied by the authors. It has not been vetted  
41  
42 18 by BMJ Publishing Group Limited (BMJ) and may not have been peer-reviewed. Any  
43  
44 19 opinions or recommendations discussed are solely those of the authors and are not endorsed  
45  
46 20 by BMJ. BMJ disclaims all liability and responsibility arising from any reliance placed on the  
47  
48 21 content. Where the content includes any translated material, BMJ does not warrant the  
49  
50 22 accuracy and reliability of the translations (including but not limited to local regulations,  
51  
52 23 clinical guidelines, terminology, drug names and drug doses), and is not responsible for any  
53  
54 24 error and/or omissions arising from translation and adaptation or otherwise.  
55  
56 25  
57  
58  
59  
60

1  
2  
3  
4  
5  
6  
7  
8  
9  
10  
11  
12  
13  
14  
15  
16  
17  
18  
19  
20  
21  
22  
23  
24  
25  
26  
27  
28  
29  
30  
31  
32  
33  
34  
35  
36  
37  
38  
39  
40  
41  
42  
43  
44  
45  
46  
47  
48  
49  
50  
51  
52  
53  
54  
55  
56  
57  
58  
59  
60

1 **ORCID iD**

2 Mehdi Mejdoubi ORCID iD 0000-0001-9422-9356

3

For peer review only

## 1 REFERENCES

- 1 Dong E, Du H, Gardner L. An interactive web-based dashboard to track COVID-19 in  
2 real time. *Lancet Infect Dis* 2020;20:533–4.
- 3 Salje H, Tran Kiem C, Lefrancq N, *et al.* Estimating the burden of SARS-CoV-2 in  
4 France. *Science* 2020;369:208–11. doi:10.1126/science.abc3517. Epub 2020 May 13.
- 5 Daily in-hospital deaths in France by counties. Available at:  
6 [https://geodes.santepubliquefrance.fr/#c=indicator&i=covid\\_hospit\\_incid.incid\\_dc&s=20-04-06&t=a01&view=map2](https://geodes.santepubliquefrance.fr/#c=indicator&i=covid_hospit_incid.incid_dc&s=20-04-06&t=a01&view=map2) [Accessed 10 June 2020]
- 7 INSEE. French population by county. Available at:  
8 <https://www.insee.fr/fr/statistiques/1893198> [Accessed 10 June 2020]
- 9 Legifrance. French counties classified by a weather index. Available at:  
10 [https://www.legifrance.gouv.fr/affichTexteArticle.do;jsessionid=C15D8E5264D6C645DD1664B5538085A0.tplgfr38s\\_2?idArticle=LEGIARTI000026910138&cidTexte=LEGITEXT000026910098&dateTexte=20200728](https://www.legifrance.gouv.fr/affichTexteArticle.do;jsessionid=C15D8E5264D6C645DD1664B5538085A0.tplgfr38s_2?idArticle=LEGIARTI000026910138&cidTexte=LEGITEXT000026910098&dateTexte=20200728) [Accessed 10 June 2020]
- 11 Cummings MJ, Baldwin MR, Abrams D, *et al.* Epidemiology, clinical course, and  
12 outcomes of critically ill adults with COVID-19 in New York City: a prospective cohort  
13 study. *Lancet* 2020 Jun 6;395(10239):1763-1770. doi: 10.1016/S0140-6736(20)31189-2.
- 14 Zhou F, Yu T, Du R, *et al.* Clinical course and risk factors for mortality of adult  
15 inpatients with COVID-19 in Wuhan, China: a retrospective cohort study. *Lancet*  
16 2020;395:1054–62. doi:10.1016/S0140-6736(20)30566-3.
- 17 Petrilli CM, Jones SA, Yang J, *et al.* Factors associated with hospital admission and  
18 critical illness among 5279 people with coronavirus disease 2019 in New York City:  
19 prospective cohort study. *BMJ* 2020;369:m1966. doi:10.1136/bmj.m1966.
- 20 Pareek M, Bangash MN, Pareek N, *et al.* Ethnicity and COVID-19: an urgent public  
21 health research priority. *Lancet* 2020;395:1421–2. doi:10.1016/S0140-6736(20)30922-3.

- 1  
2  
3 1 10 Ing AJ, Cocks C, Green JP. COVID-19: in the footsteps of Ernest Shackleton. *Thorax*  
4  
5 2 2020 Aug;75(8):693-694. doi: 10.1136/thoraxjnl-2020-215091.  
6  
7  
8 3 11 Mizumoto K, Kagaya K, Zarebski A, *et al.* Estimating the asymptomatic proportion of  
9  
10 4 coronavirus disease 2019 (COVID-19) cases on board the Diamond Princess cruise ship,  
11  
12 5 Yokohama, Japan, 2020. *Euro Surveill* 2020;25:2000180. doi:10.2807/1560-  
13  
14 6 7917.ES.2020.25.10.2000180.  
15  
16  
17 7 12 Liu J, Zhou J, Yao J, *et al.* Impact of meteorological factors on the COVID-19  
18  
19 8 transmission: a multi-city study in China. *Sci Total Environ* 2020;726:138513.  
20  
21 9 doi:10.1016/j.scitotenv.2020.138513.  
22  
23  
24 10 13 Russell TW, Wu JT, Clifford S, *et al*; Centre for the Mathematical Modelling of  
25  
26 11 Infectious Diseases COVID-19 Working Group. Effect of internationally imported cases  
27  
28 12 on internal spread of COVID-19: a mathematical modelling study. *Lancet Public Health*  
29  
30 13 2020 Dec 7:S2468-2667(20)30263-2. doi: 10.1016/S2468-2667(20)30263-2.  
31  
32  
33 14 14 Walker A, Houwaart T, Wienemann T, *et al.* Genetic structure of SARS-CoV-2 reflects  
34  
35 15 clonal superspreading and multiple independent introduction events, North-Rhine  
36  
37 16 Westphalia, Germany, February and March 2020. *Euro Surveill* 2020;25:2000746.  
38  
39 17 doi:10.2807/1560-7917.ES.2020.25.22.2000746.  
40  
41  
42 18 15 Shi P, Dong Y, Yan H, *et al.* Impact of temperature on the dynamics of the COVID-19  
43  
44 19 outbreak in China. *Sci Total Environ* 2020;728:138890.  
45  
46 20 doi:10.1016/j.scitotenv.2020.138890.  
47  
48  
49 21 16 Qi H, Xiao S, Shi R, *et al.* COVID-19 transmission in mainland China is associated with  
50  
51 22 temperature and humidity: a time-series analysis. *Sci Total Environ* 2020;728:138778.  
52  
53 23 doi:10.1016/j.scitotenv.2020.138778.  
54  
55  
56 24 17 Sajadi MM, Habibzadeh P, Vintzileos A, *et al.* Temperature, humidity, and latitude  
57  
58 25 analysis to estimate potential spread and seasonality of coronavirus disease 2019  
59  
60

- 1 (COVID-19). *JAMA Netw Open* 2020;3:e2011834.  
2  
3  
4  
5  
6  
7  
8  
9  
10  
11  
12  
13  
14  
15  
16  
17  
18  
19  
20  
21  
22  
23  
24  
25  
26  
27  
28  
29  
30  
31  
32  
33  
34  
35  
36  
37  
38  
39  
40  
41  
42  
43  
44  
45  
46  
47  
48  
49  
50  
51  
52  
53  
54  
55  
56  
57  
58  
59  
60
- 1 (COVID-19). *JAMA Netw Open* 2020;3:e2011834.  
2  
3  
4  
5  
6  
7  
8  
9  
10  
11  
12  
13  
14  
15  
16  
17  
18  
19  
20  
21  
22  
23  
24  
25  
26  
27  
28  
29  
30  
31  
32  
33  
34  
35  
36  
37  
38  
39  
40  
41  
42  
43  
44  
45  
46  
47  
48  
49  
50  
51  
52  
53  
54  
55  
56  
57  
58  
59  
60
- 18 Mejdoubi M, Kyndt X, Djennaoui M. ICU admissions and in-hospital deaths linked to  
19 COVID-19 in the Paris region are correlated with previously observed ambient  
20 temperature. *PLoS One* 2020;15:e0242268. doi:10.1371/journal.pone.0242268.  
21  
22  
23  
24  
25  
26  
27  
28  
29  
30  
31  
32  
33  
34  
35  
36  
37  
38  
39  
40  
41  
42  
43  
44  
45  
46  
47  
48  
49  
50  
51  
52  
53  
54  
55  
56  
57  
58  
59  
60
- 19 Isaia G, Diémoz H, Maluta F, *et al.* Does solar ultraviolet radiation play a role in  
20 COVID-19 infection and deaths? An environmental ecological study in Italy. *Sci Total*  
21 *Environ* 2020;143757. doi:10.1016/j.scitotenv.2020.143757.  
22  
23  
24  
25  
26  
27  
28  
29  
30  
31  
32  
33  
34  
35  
36  
37  
38  
39  
40  
41  
42  
43  
44  
45  
46  
47  
48  
49  
50  
51  
52  
53  
54  
55  
56  
57  
58  
59  
60
- 20 Zhang HJ, Su YY, Xu SL, *et al.* Asymptomatic and symptomatic SARS-CoV-2  
21 infections in close contacts of COVID-19 patients: a seroepidemiological study. *Clin*  
22 *Infect Dis* 2020 Jun 16:ciaa771. doi:10.1093/cid/ciaa771.  
23  
24  
25  
26  
27  
28  
29  
30  
31  
32  
33  
34  
35  
36  
37  
38  
39  
40  
41  
42  
43  
44  
45  
46  
47  
48  
49  
50  
51  
52  
53  
54  
55  
56  
57  
58  
59  
60
- 21 Prata DN, Rodrigues W, Bermejo PH. Temperature significantly changes COVID-19  
22 transmission in (sub)tropical cities of Brazil. *Sci Total Environ* 2020;729:138862.  
23  
24  
25  
26  
27  
28  
29  
30  
31  
32  
33  
34  
35  
36  
37  
38  
39  
40  
41  
42  
43  
44  
45  
46  
47  
48  
49  
50  
51  
52  
53  
54  
55  
56  
57  
58  
59  
60
- 22 Hallal PC, Hartwig FP, Horta BL, *et al.* SARS-CoV-2 antibody prevalence in Brazil:  
23 results from two successive nationwide serological household surveys. *Lancet Glob*  
24 *Health* 2020;8(11):e1390–8. doi:10.1016/S2214-109X(20)30387-9.  
25  
26  
27  
28  
29  
30  
31  
32  
33  
34  
35  
36  
37  
38  
39  
40  
41  
42  
43  
44  
45  
46  
47  
48  
49  
50  
51  
52  
53  
54  
55  
56  
57  
58  
59  
60
- 23 Zoran MA, Savastru RS, Savastru DM, *et al.* Assessing the relationship between surface  
24 levels of PM2.5 and PM10 particulate matter impact on COVID-19 in Milan, Italy. *Sci*  
25 *Total Environ* 2020;738:139825. doi:10.1016/j.scitotenv.2020.139825.  
26  
27  
28  
29  
30  
31  
32  
33  
34  
35  
36  
37  
38  
39  
40  
41  
42  
43  
44  
45  
46  
47  
48  
49  
50  
51  
52  
53  
54  
55  
56  
57  
58  
59  
60
- 24 Jüni P, Rothenbühler M, Bobos P, *et al.* Impact of climate and public health interventions  
25 on the COVID-19 pandemic: a prospective cohort study. *CMAJ* 2020;cmaj.200920.  
26  
27  
28  
29  
30  
31  
32  
33  
34  
35  
36  
37  
38  
39  
40  
41  
42  
43  
44  
45  
46  
47  
48  
49  
50  
51  
52  
53  
54  
55  
56  
57  
58  
59  
60
- doi:10.1503/cmaj.200920.



1  
2  
3 **1 Figure legends**  
4

5 2

6  
7 **3 Figure 1** Main climate zones (H1a, H1b, H1c, H2, H3) of continental France counties  
8  
9 (“*départements*”).  
10

11  
12 **5 Figure 2** (A) Boxplots of in-hospital mortality rates according to the main climate zones. The  
13  
14 internal bold horizontal line is the median; the lower and upper box limits are the 1st and 3<sup>rd</sup>  
15  
16 quartile, respectively; and the T-bars represent range. (B) Multivariate linear-regression  
17  
18 analysis (95% confidence intervals (CI); with H2 serving as the reference). The analysis  
19  
20 retained climate zones (H1a, H1b) and population density as independent factors significantly  
21  
22 influencing in-hospital mortality.  
23  
24  
25  
26  
27  
28  
29  
30  
31  
32  
33  
34  
35  
36  
37  
38  
39  
40  
41  
42  
43  
44  
45  
46  
47  
48  
49  
50  
51  
52  
53  
54  
55  
56  
57  
58  
59  
60

1  
2  
3  
4  
5  
6  
7  
8  
9  
10  
11  
12  
13  
14  
15  
16  
17  
18  
19  
20  
21  
22  
23  
24  
25  
26  
27  
28  
29  
30  
31  
32  
33  
34  
35  
36  
37  
38  
39  
40  
41  
42  
43  
44  
45  
46  
47  
48  
49  
50  
51  
52  
53  
54  
55  
56  
57  
58  
59  
60



Figure 1. Main Climate Zones (H1a, H1b, H1c, H2, H3) of Continental France Administrative Areas ("Départements").

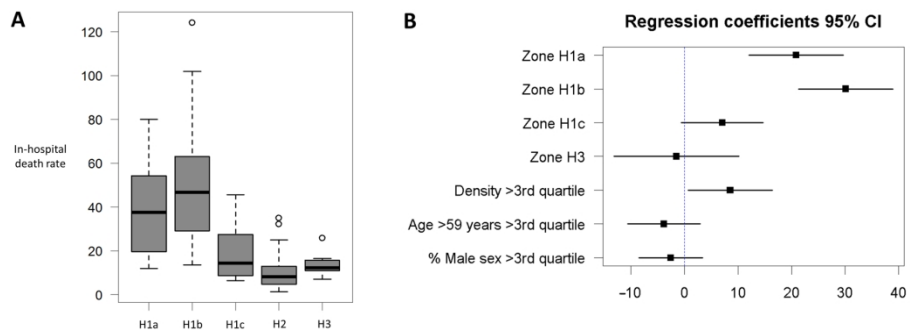

Figure 2. Boxplots of In-Hospital Mortality Rates According to the Main Climate Zones (A). The internal bold horizontal line is the median; the lower and upper box limits are the 1st and 3rd quartile, respectively; and the T-bars represent range. Multivariate linear-regression analysis (B) (95% confidence intervals CI; with H2 serving as the reference). The analysis retained climate zones (H1a, H1b) and population density as independent factors significantly influencing in-hospital mortality.

## Supplemental material

### Appendix 1 Multivariate multiple-linear regression analysis of initial data

| Factor (reference zone H2)                   | Regression coefficient [95% CI] | p value                |
|----------------------------------------------|---------------------------------|------------------------|
| Zone H1a                                     | 14.6 [3.8 to 25.4]              | 0.00962                |
| Zone H1b                                     | 37.2 [27.6 to 46.9]             | 4.39×10 <sup>-11</sup> |
| Zone H1c                                     | 6.0 [-2.7 to 14.9]              | 0.183                  |
| Zone H3                                      | 6.9 [-6.9 to 20.8]              | 0.329                  |
| Population density >3 <sup>rd</sup> quartile | 0.003 [0.001 to 0.004]          | 0.000229               |
| Age >59 y >3 <sup>rd</sup> quartile          | -0.97 [-1.7 to -0.1]            | 0.0208                 |
| Male sex, % >3 <sup>rd</sup> quartile        | 5.2 [-2.5 to 13.1]              | 0.187                  |

### Appendix 2 Multivariate multiple-linear regression analysis excluding outliers

| Factor (reference zone H2)                   | Regression coefficient [95% CI] | p value                |
|----------------------------------------------|---------------------------------|------------------------|
| Zone H1a                                     | 15.2 [6.6 to 23.8]              | 0.000785               |
| Zone H1b                                     | 30.4 [22.1 to 37.9]             | 7.65×10 <sup>-11</sup> |
| Zone H1c                                     | 6.8 [-0.1 to 13.8]              | 0.0574                 |
| Zone H3                                      | 3.4 [-7.5 to 14.4]              | 0.539                  |
| Population density >3 <sup>rd</sup> quartile | 0.004 [0.002 to 0.006]          | 0.00028                |
| Age >59 years >3 <sup>rd</sup> quartile      | -0.6 [-1.3 to -0.04]            | 0.0404                 |
| Male sex, % >3 <sup>rd</sup> quartile        | 0.6 [-5.6 to 6.9]               | 0.838                  |

1  
2  
3  
4  
5  
6  
7  
8  
9  
10  
11  
12  
13  
14  
15  
16  
17  
18  
19  
20  
21  
22  
23  
24  
25  
26  
27  
28  
29  
30  
31  
32  
33  
34  
35  
36  
37  
38  
39  
40  
41  
42  
43  
44  
45  
46  
47  
48  
49  
50  
51  
52  
53  
54  
55  
56  
57  
58  
59  
60STROBE Statement—Checklist of items that should be included in reports of *cross-sectional studies*

|                              | Item No | Recommendation                                                                                                                                                                                               | Page No      |
|------------------------------|---------|--------------------------------------------------------------------------------------------------------------------------------------------------------------------------------------------------------------|--------------|
| <b>Title and abstract</b>    | 1       | (a) Indicate the study's design with a commonly used term in the title or the abstract                                                                                                                       | 1            |
|                              |         | (b) Provide in the abstract an informative and balanced summary of what was done and what was found                                                                                                          | 2            |
| <b>Introduction</b>          |         |                                                                                                                                                                                                              |              |
| Background/rationale         | 2       | Explain the scientific background and rationale for the investigation being reported                                                                                                                         | 4            |
| Objectives                   | 3       | State specific objectives, including any prespecified hypotheses                                                                                                                                             | 4            |
| <b>Methods</b>               |         |                                                                                                                                                                                                              |              |
| Study design                 | 4       | Present key elements of study design early in the paper                                                                                                                                                      | 5            |
| Setting                      | 5       | Describe the setting, locations, and relevant dates, including periods of recruitment, exposure, follow-up, and data collection                                                                              | 5            |
| Participants                 | 6       | (a) Give the eligibility criteria, and the sources and methods of selection of participants                                                                                                                  | 5            |
| Variables                    | 7       | Clearly define all outcomes, exposures, predictors, potential confounders, and effect modifiers. Give diagnostic criteria, if applicable                                                                     | 5            |
| Data sources/<br>measurement | 8*      | For each variable of interest, give sources of data and details of methods of assessment (measurement). Describe comparability of assessment methods if there is more than one group                         | 5            |
| Bias                         | 9       | Describe any efforts to address potential sources of bias                                                                                                                                                    | 5            |
| Study size                   | 10      | Explain how the study size was arrived at                                                                                                                                                                    | 5            |
| Quantitative variables       | 11      | Explain how quantitative variables were handled in the analyses. If applicable, describe which groupings were chosen and why                                                                                 | 5            |
| Statistical methods          | 12      | (a) Describe all statistical methods, including those used to control for confounding                                                                                                                        | 6            |
|                              |         | (b) Describe any methods used to examine subgroups and interactions                                                                                                                                          | 6            |
|                              |         | (c) Explain how missing data were addressed                                                                                                                                                                  | NA           |
|                              |         | (d) If applicable, describe analytical methods taking account of sampling strategy                                                                                                                           |              |
|                              |         | (e) Describe any sensitivity analyses                                                                                                                                                                        | NA           |
| <b>Results</b>               |         |                                                                                                                                                                                                              |              |
| Participants                 | 13*     | (a) Report numbers of individuals at each stage of study—eg numbers potentially eligible, examined for eligibility, confirmed eligible, included in the study, completing follow-up, and analysed            | NA           |
|                              |         | (b) Give reasons for non-participation at each stage                                                                                                                                                         | NA           |
|                              |         | (c) Consider use of a flow diagram                                                                                                                                                                           | NA           |
| Descriptive data             | 14*     | (a) Give characteristics of study participants (eg demographic, clinical, social) and information on exposures and potential confounders                                                                     | 6            |
|                              |         | (b) Indicate number of participants with missing data for each variable of interest                                                                                                                          | NA           |
| Outcome data                 | 15*     | Report numbers of outcome events or summary measures                                                                                                                                                         | 6            |
| Main results                 | 16      | (a) Give unadjusted estimates and, if applicable, confounder-adjusted estimates and their precision (eg, 95% confidence interval). Make clear which confounders were adjusted for and why they were included | 6, 7, 16, 17 |

|                          |    |                                                                                                                                                                            |    |
|--------------------------|----|----------------------------------------------------------------------------------------------------------------------------------------------------------------------------|----|
|                          |    | (b) Report category boundaries when continuous variables were categorized                                                                                                  | NA |
|                          |    | (c) If relevant, consider translating estimates of relative risk into absolute risk for a meaningful time period                                                           | NA |
| Other analyses           | 17 | Report other analyses done—eg analyses of subgroups and interactions, and sensitivity analyses                                                                             | NA |
| <b>Discussion</b>        |    |                                                                                                                                                                            |    |
| Key results              | 18 | Summarise key results with reference to study objectives                                                                                                                   | 7  |
| Limitations              | 19 | Discuss limitations of the study, taking into account sources of potential bias or imprecision. Discuss both direction and magnitude of any potential bias                 | 12 |
| Interpretation           | 20 | Give a cautious overall interpretation of results considering objectives, limitations, multiplicity of analyses, results from similar studies, and other relevant evidence | 9  |
| Generalisability         | 21 | Discuss the generalisability (external validity) of the study results                                                                                                      | 11 |
| <b>Other information</b> |    |                                                                                                                                                                            |    |
| Funding                  | 22 | Give the source of funding and the role of the funders for the present study and, if applicable, for the original study on which the present article is based              | 1  |

\*Give information separately for exposed and unexposed groups.

**Note:** An Explanation and Elaboration article discusses each checklist item and gives methodological background and published examples of transparent reporting. The STROBE checklist is best used in conjunction with this article (freely available on the Web sites of PLoS Medicine at <http://www.plosmedicine.org/>, Annals of Internal Medicine at <http://www.annals.org/>, and Epidemiology at <http://www.epidem.com/>). Information on the STROBE Initiative is available at [www.strobe-statement.org](http://www.strobe-statement.org).
