# Supplementary material for: Link between COVID-19-related in-hospital mortality in continental France administrative areas and weather: an ecological study
Source: PubMed Central journal article supplement — BMJ Open. 2021 Mar 11;11(3):e043269. doi: 10.1136/bmjopen-2020-043269 (PMC7956732; doi:10.1136/bmjopen-2020-043269), 2021-03-11
Supplement: bmjopen-2020-043269supp001.pdf [file bmjopen-2020-043269supp001.pdf]

## Supplemental material

### Appendix 1 Multivariate multiple-linear regression analysis of initial data

| Factor (reference zone H2)                   | Regression coefficient [95% CI] | p value                |
|----------------------------------------------|---------------------------------|------------------------|
| Zone H1a                                     | 14.6 [3.8 to 25.4]              | 0.00962                |
| Zone H1b                                     | 37.2 [27.6 to 46.9]             | 4.39×10 <sup>-11</sup> |
| Zone H1c                                     | 6.0 [-2.7 to 14.9]              | 0.183                  |
| Zone H3                                      | 6.9 [-6.9 to 20.8]              | 0.329                  |
| Population density >3 <sup>rd</sup> quartile | 0.003 [0.001 to 0.004]          | 0.000229               |
| Age >59 y >3 <sup>rd</sup> quartile          | -0.97 [-1.7 to -0.1]            | 0.0208                 |
| Male sex, % >3 <sup>rd</sup> quartile        | 5.2 [-2.5 to 13.1]              | 0.187                  |

### Appendix 2 Multivariate multiple-linear regression analysis excluding outliers

| Factor (reference zone H2)                   | Regression coefficient [95% CI] | p value                |
|----------------------------------------------|---------------------------------|------------------------|
| Zone H1a                                     | 15.2 [6.6 to 23.8]              | 0.000785               |
| Zone H1b                                     | 30.4 [22.1 to 37.9]             | 7.65×10 <sup>-11</sup> |
| Zone H1c                                     | 6.8 [-0.1 to 13.8]              | 0.0574                 |
| Zone H3                                      | 3.4 [-7.5 to 14.4]              | 0.539                  |
| Population density >3 <sup>rd</sup> quartile | 0.004 [0.002 to 0.006]          | 0.00028                |
| Age >59 years >3 <sup>rd</sup> quartile      | -0.6 [-1.3 to -0.04]            | 0.0404                 |
| Male sex, % >3 <sup>rd</sup> quartile        | 0.6 [-5.6 to 6.9]               | 0.838                  |
